# Supplementary material for: Effect of dietary oil from Camelina sativa on the growth performance, fillet fatty acid profile and gut microbiome of gilthead Sea bream (Sparus aurata)
Source: PeerJ. 2020 Dec 9;8:e10430. doi: 10.7717/peerj.10430 (PMC7733328; doi:10.7717/peerj.10430)
Supplement: Supplemental Information 1 [file peerj-08-10430-s001.xlsx]

## Sheet: Fish weight&length 
PAPER TITLE:	Effect of dietary oil from Camelina sativa on the growth performance, fillet fatty acid profile and gut microbiome of gilthead Sea bream (Sparus aurata)
AUTHORS:	David Huyben, Simona Rimoldi, Chiara Ceccotti, Daniel Montero, Monica Betancor, Federica Iannini, Genciana Terova
CRITERIA:	Raw data for lipid analysis
TANK	DIET	WEIGHT initial	Length initial	Weight Week1	Length Week1	Weight Week2	Length Week2	Weight Week3	Length Week3
67	1	33.5	12	46.6	13	68.7	15	114.6	17.2
67	1	30.9	12	58.7	13.9	76.4	15.3	90.9	17.2
67	1	30.8	11.6	55.3	13.8	75.7	15.3	74.7	17.2
67	1	32.1	12	49.1	13.3	80	15.5	92.4	17.2
67	1	30.5	11.7	49.1	13.4	70.9	15	110.8	17.2
67	1	31.6	11.2	54.6	14	61.3	14.4	123.4	17.2
67	1	30	11.7	59.5	14.1	68.8	14.9	111	17.2
67	1	31.4	12	58.4	14.1	53.2	14	112.4	17.2
67	1	31.5	12	52.4	13.6	79.7	15.6	102.3	17.2
67	1	32.4	12.6	54.9	13.5	86	15.3	105.6	17.2
67	1	31.5	12	51.2	13.7	82.8	15.6	91.3	17.2
67	1	31.1	12.9	51.9	13.2	67.8	15.3	77.7	17.2
67	1	31.1	12.9	54.5	13.7	80.4	15.5	90.8	17.2
67	1	33	12.4	50.8	13.5	66.2	15.2	98.8	17.2
67	1	30.8	12.8	51.3	13.4	95.6	16.5	125.9	17.2
67	1	31.8	12	55.3	14.2	60.8	14.4	95.1	17.2
67	1	30.2	12	47.9	13.3	72.5	15.3	78.6	17.2
67	1	31	12	59.7	14.1	59.8	14.4	100.1	17.2
67	1	30.9	12.2	49.3	13.4	64.8	14.8	94.6	17.2
67	1	31.4	11.9	67.4	14.8	69.2	15.2	87.5	17.2
67	1	31.8	12	55.9	13.9	76.6	15.4	110.8	17.2
67	1	34	12	52	13.6	64.4	14.6	83.9	17.2
67	1	30	11.9	50.3	13.4	60.4	14.6	103.6	17.2
67	1	30.4	11.8	54	14	71	15	104.5	17.2
67	1	34.4	12.5	54.9	14	64.1	15.1	107	17.2
67	1	32.8	11.9	58	13.7	81	15.6	97.1	17.2
67	1	34.7	12.2	55.6	14	73.2	15.3	89	17.2
67	1	33.8	12.2	49.9	13.8	68.3	15	78.9	17.2
67	1	33.8	12.2	52.2	13.6	63.4	14.6	96.7	17.2
67	1	32.8	12	53.9	13.9	63.5	14.7	104.3	17.2
67	1	31.4	12	52.9	13.6	69.6	15	80.1	17.2
67	1	34.4	12.5	46.7	13.4	72.6	15.3	100.1	17.2
67	1	32.6	12.2	55.7	13.8	75.1	15.3	77.4	17.2
67	1	31	12	46.3	13.2	56.8	14	92.9	17.2
67	1	31.8	12	54.4	14	69.5	15.3	83	17.2
67	1	36.9	12.7	48	13.3	66.5	14.4	86.3	17.2
67	1	35.1	12.5	50.9	13.5	67	15.2	94.3	17.2
67	1	36.5	12.7	51.7	13.5	66.6	14.7	77.8	17.2
67	1	31.8	12.2	53.9	13.9	63.7	14.7	79.3	17.2
67	1	32.3	12	51.4	13.7	58.8	14.7	84.3	17.2
67	1	32.6	12.1	54.3	13.8	62.4	14.9	88.8	17.2
67	1	30.2	11.9	54.8	13.9	67.9	15.2	99.5	17.2
67	1	34.9	12.6	51.1	13.5	66.6	14.9	68.4	17.2
67	1	35	12.2	46.9	13.2	75.7	15.6	107.2	17.2
67	1	31	12	47.6	13.4	72	14.8	85.9	17.2
67	1	33.7	12	58.6	13	75	14.6	92.1	17.2
67	1	33.8	12.1	57.7	14	75.2	15.5	88.9	17.2
67	1	30.1	11.6	51.3	13.3	78.9	15	90.4	17.2
67	1	34	12.4	49.8	13.7	77.2	15.6	92.3	17.2
67	1	34.3	12.1	43.4	13.1	66.3	14.6		17.2
68	2	32	12.1	48.6	13.2	69.5	15	97	17.2
68	2	31.6	12	43.1	13	62.6	14.4	93.9	17.2
68	2	35	12.5	52.2	13.3	70.7	15.2	94.8	17.2
68	2	30.9	12	45.6	13	56.7	14	80.1	17.2
68	2	30.2	11.9	47	12.6	75.7	15.3	104.5	17.2
68	2	32	12	55.6	13.3	71	15	93	17.2
68	2	32.1	11.8	48.7	12.4	71.4	15.1	103.3	17.2
68	2	32.1	12.5	58.6	14.2	73.6	15.6	110.9	17.2
68	2	31.4	12	49.7	13.4	77.6	15	97	17.2
68	2	31.5	11.6	55.1	13.5	93.2	16	72.3	17.2
68	2	32.5	12.8	51.8	13.9	79.4	15.5	73.5	17.2
68	2	32.7	12.1	56.8	14.4	77.6	14.6	98.3	17.2
68	2	31.8	12.5	48.6	13.4	66.9	15.1	79.2	17.2
68	2	30.3	11.4	49.1	12.4	68.2	14.9	75.7	17.2
68	2	33.2	11.5	64.2	14.3	60.7	14.2	124.8	17.2
68	2	32.6	12.2	50.5	12.1	70.6	15	89.9	17.2
68	2	31.8	12.1	54.8	14	62.8	14.6	90.7	17.2
68	2	31.3	12.1	56.4	14	66	14.8	75.1	17.2
68	2	33.2	12	54	14	61	15	176.3	17.2
68	2	32.1	11.8	52.9	13.6	62	14	89.4	17.2
68	2	30	11.8	53.7	13.8	72	15.2	99.9	17.2
68	2	31.6	12.1	54.9	13.7	73.9	15.3	75.5	17.2
68	2	34	12.8	53.6	13.7	57.5	14.4	84.3	17.2
68	2	31.2	12	49.4	13.4	82.9	15.7	86.4	17.2
68	2	30	11.9	54.8	13.9	88.2	15.6	88.2	17.2
68	2	33.3	12.2	54.8	14	68.3	15	87.7	17.2
68	2	32.7	12.4	60.7	14.1	88.9	15.1	90.6	17.2
68	2	31.8	12	56.8	14.2	56.3	14.2	78.8	17.2
68	2	31.6	12	49.5	13.5	70.8	14.9	91	17.2
68	2	35	12	55.4	13.8	83.5	15.7	96.3	17.2
68	2	30.5	11.8	50.9	13.7	73.2	15.3	93.1	17.2
68	2	36.9	12.8	53.6	13.5	77.1	15.8	79.9	17.2
68	2	36.1	12.8	48.6	13.5	71.1	15.6	45.8	17.2
68	2	36.2	12.6	50	13.5	70.8	15.3	90.6	17.2
68	2	35.3	12.2	54	13.8	58.6	14.6	97	17.2
68	2	31.7	12	50.5	13.6	63.6	14.7	73.1	17.2
68	2	34.3	12.5	57.8	14.3	51.8	13.7	89.3	17.2
68	2	33.8	12	54.5	13.9	89.4	15	104.3	17.2
68	2	30.9	12	48.1	12.7	67.7	14.9	80.3	17.2
68	2	31.1	12	51.2	13.8	79.3	15.3	92.7	17.2
68	2	33.4	12	54.5	13.9	51	14.4	112.9	17.2
68	2	34.7	12.5	40.2	13.7	61.2	14.1	96.6	17.2
68	2	35.6	12.5	61.4	14.2	70.8	15.1	79.8	17.2
68	2	33.7	12	49.4	13.3	70.6	15	101.6	17.2
68	2	35.1	12.5	49.2	12.5	56.1	14.2	115	17.2
68	2	30	12	52.3	12.9	63.2	14.9	94.5	17.2
68	2	30.5	11.5	42.5	12.5	71.6	14.7	82.7	17.2
68	2	30.8	12	50.5	13.6	55.1	14.8	92.8	17.2
68	2	31.8	12	41.5	12.9	76.9	15.1	95.6	17.2
68	2	31	11.6	57.2	14	69	15	77.4	17.2
69	3	30	12	37.7	12.9	77.5	15.1	73.5	17.2
69	3	31.9	12.4	63.5	14.7	69.3	15	82.6	17.2
69	3	31.2	12	47.7	13.5	61.1	14.5	80.3	17.2
69	3	31.2	12	45.2	12.3	61.4	14.5	98.8	17.2
69	3	30	12	52.3	13.5	88.5	16	72.4	17.2
69	3	31.5	12	53.2	13.5	60.1	14.5	118	17.2
69	3	30	11.9	49.6	13.6	55.8	13.8	76.3	17.2
69	3	30	12	51.7	13.8	74.1	15.1	84	17.2
69	3	32.9	12.2	48.7	13.4	72	15	75.2	17.2
69	3	31.9	12.1	52.4	14.1	74.1	15	83.3	17.2
69	3	30.5	12.1	52.8	13.8	82.8	15.6	83.2	17.2
69	3	30.9	12	48.5	13.7	77	15.5	68.5	17.2
69	3	32.8	12.2	45.7	14	81.9	15.3	76.6	17.2
69	3	33.3	12.2	43.6	13.4	69.7	15.2	82.1	17.2
69	3	31.5	12.9	53.1	13.9	57.5	14.4	91.2	17.2
69	3	33.2	12.2	43	13.3	58.5	14.6	73.5	17.2
69	3	30.3	12	42.1	13.3	61.4	14.7	91	17.2
69	3	30	11.8	52.3	12.8	66.3	14.9	76.8	17.2
69	3	31.8	12.1	55.1	13.7	76.1	15.5	113.8	17.2
69	3	30.6	12	51.1	13.8	48	13.8	85.7	17.2
69	3	30.3	12	59.1	14.2	62.9	14.6	76.6	17.2
69	3	30.9	11.6	46.4	13.6	48	13.7	106	17.2
69	3	30	11.9	46.6	13.7	64.5	14.7	77.8	17.2
69	3	30.8	12	49.9	13.2	62.2	14.6	92	17.2
69	3	34.6	12.3	47.5	13	54	14.3	94.8	17.2
69	3	33.9	12.2	55.4	13.9	56.2	14.1	79.9	17.2
69	3	30.1	12	49	13.4	84.2	15.3	97	17.2
69	3	34.8	12.1	55.7	14.2	67.5	15	79.6	17.2
69	3	34.6	12.4	53.2	13.7	53.8	14.3	96.4	17.2
69	3	31.5	12	49.7	13.6	57.5	14.4	100.7	17.2
69	3	32.7	12.2	54	13.8	58.3	14.4	78.2	17.2
69	3	30.3	11.5	49.8	13.6	53.5	14.2	92.6	17.2
69	3	35.7	12.5	48.1	12.7	73.5	15.6	72.8	17.2
69	3	34.1	12.4	55.9	14.1	64.5	14.7	79.3	17.2
69	3	34.2	12.4	53.3	14	70.7	15.2	83.9	17.2
69	3	35.5	12.3	47.2	13.5	60.1	14.5	87.7	17.2
69	3	32	12.1	44.6	12.8	68.9	15	75.8	17.2
69	3	33.7	12.3	47.6	13.6	59.8	14	99.4	17.2
69	3	32.3	12	43.6	12.9	73.1	15.1	114.9	17.2
69	3	34	12.5	49.5	13.8	72.6	14.9	76.3	17.2
69	3	30.5	12	54.2	12.6	64.4	14.7	80.7	17.2
69	3	35.9	12.9	57	14.3	65.1	15	80.8	17.2
69	3	36	12.8	51.5	13.6	62.1	14.9	105.5	17.2
69	3	35	12.4	49.8	13.5	64.8	14.7	94.4	17.2
69	3	36.5	12.5	57.1	14	61.9	15	73.4	17.2
69	3	35.8	12.6	50.1	13.5	65.6	14.7	59.7	17.2
69	3	36.1	12.6	51.3	13.8	64.1	15.6	81.7	17.2
69	3	36.8	12.6	53.6	13.8	64.5	14.8	71	17.2
69	3	34.6	12	48.1	13.4	60.3	14.4	73.6	17.2
69	3	37	12.5						17.2
70	4	31.5	12.1	58.9	13.9	71.1	15	80.7	17.2
70	4	32.1	12	53.5	13.6	77.4	15	89.7	17.2
70	4	33.1	12	51.5	13.6	52.7	14.5	76.2	17.2
70	4	31.9	11.8	47.9	12.6	57.7	14.9	87	17.2
70	4	30.1	12	53	12.7	60.6	14.6	102.6	17.2
70	4	30.9	12	50.2	13.1	60.9	15.3	72.3	17.2
70	4	31.4	11.1	44.8	12.9	54.3	14.4	84	17.2
70	4	32.2	12.1	52	14	82.3	15.8	67	17.2
70	4	32.4	12	52.8	14	75.9	15.2	80.4	17.2
70	4	31.1	11.8	55.5	13.8	60.5	14	77.2	17.2
70	4	32.9	12	45.7	13.3	60.2	14.1	74.2	17.2
70	4	31.4	11.9	51.7	12.6	71	14.8	74	17.2
70	4	31.4	12	54.6	12.2	55.4	14	95.8	17.2
70	4	30.1	12	52.3	13.6	57.6	14.2	97.4	17.2
70	4	31.2	12	46.2	13.4	59.6	14.7	88.2	17.2
70	4	31.3	11.9	57	13.7	66.9	15	80.7	17.2
70	4	33	12.5	49.5	13.7	67.3	14.7	80.2	17.2
70	4	31	12	49.3	13.4	77	15.3	89.3	17.2
70	4	32.2	12.1	47.8	13.5	65.4	14.6	78.7	17.2
70	4	32.5	12.4	54.3	14.2	54.1	14.3	109.8	17.2
70	4	30	11.8	44.1	13	56.8	14.4	77.4	17.2
70	4	32.4	12.1	45.7	13.5	68.1	15	101.7	17.2
70	4	30	11.7	54	13.8	69.1	15	76.2	17.2
70	4	32.7	12.4	51.4	13.7	59	14.5	71.4	17.2
70	4	33.6	12.2	49.2	13.3	65.5	15	86.5	17.2
70	4	34.5	12.5	46.7	13.5	67.5	14.9	78.5	17.2
70	4	32	12.1	44.5	13.5	52.4	14.7	83.4	17.2
70	4	30.9	12	53.8	13.7	60.1	14.2	85.7	17.2
70	4	34.7	12.4	54.9	13.8	58.8	14.4	81.1	17.2
70	4	31.9	12.3	51.9	13.6	62.6	14.7	83	17.2
70	4	33.7	12	46.8	13.3	61.4	14.4	73.7	17.2
70	4	34.8	12.1	51	13.8	61.1	14	77.2	17.2
70	4	37	12.8	44.7	13	70.6	15	110.8	17.2
70	4	36.2	12.5	60.7	14.3	65	14.6	92.7	17.2
70	4	33.6	12.2	58.6	14	65.6	14.9	106.7	17.2
70	4	34.4	12.3	42.3	12.8	51.7	14	75.2	17.2
70	4	32	11.8	53.8	13.8	55	14.2	101.6	17.2
70	4	36.6	12.6	48.5	13.5	78.2	15.5	75.9	17.2
70	4	33.6	12.7	54.3	14.2	63.2	14.7	87.5	17.2
70	4	33.7	12.1	49.2	13.5	61.4	14.5	90.8	17.2
70	4	37	12.8	44	13.7	67	14.8	72.4	17.2
70	4	36.8	12.5	56.7	14	68.2	14.4	67.2	17.2
70	4	35.6	12.9	51.8	13.6	77	15.5	91.7	17.2
70	4	36.2	12.9	49.7	13.4	59.2	14.6	76.8	17.2
70	4	37	12.7	62.4	14.5	76.1	15.2	77.7	17.2
70	4	35	12.1	48.3	12.8	56.9	14.4	82.4	17.2
70	4	35.9	12.5	53.9	13.6	54.6	14.1	84.9	17.2
70	4	37	12.8	47.8	13.3	67.1	14.7	68.1	17.2
70	4	35.4	12.5	50.4	13.5	73.2	14.5	77.8	17.2
70	4	35.93	12.6						17.2
71	1	31.9	12.1	55.5	13.4	74.2	14.9	101.2	17.2
71	1	30.1	12	53.8	13.9	72.5	14.6	82.2	17.2
71	1	31.7	11.9	54	13.4	58.7	14.6	86.4	17.2
71	1	32.3	12	49.1	13.4	76.8	15	72	17.2
71	1	30.8	11.7	47.7	13.8	66.3	15	90.1	17.2
71	1	30.9	12	47.5	13.2	63.9	14.6	100.6	17.2
71	1	32.1	12.1	58.3	14.3	71.4	14.9	83.9	17.2
71	1	32.2	12.6	44.5	13.2	72.6	14.3	76.2	17.2
71	1	31.5	11.5	53.1	13.7	59.5	14.3	100.5	17.2
71	1	32	12.3	58	14.2	65.6	14.8	116.4	17.2
71	1	30.8	11.9	53.7	13.8	67.8	14.7	74.4	17.2
71	1	30.6	11.9	42.8	13.2	57.4	14.4	72.2	17.2
71	1	30.7	12	52.5	13.8	66.4	14.6	105.7	17.2
71	1	32.7	12.6	45.6	13	70.6	15.2	97.9	17.2
71	1	32.7	12.4	49	13.7	74.9	15.3	80.5	17.2
71	1	31.8	12.2	52.2	12.8	80	15.5	79.5	17.2
71	1	30.6	11.1	56.5	14.2	67.6	14.4	98.8	17.2
71	1	35.1	12.2	50.9	13.7	60.4	14.6	70.7	17.2
71	1	32.8	12.2	51.4	13.6	64.8	15	87.4	17.2
71	1	35	12	53.6	13.5	69.8	15.2	78	17.2
71	1	33.7	12.3	48.8	13.6	64.9	15.1	77.4	17.2
71	1	31.2	12	52.1	13.7	65.7	15	92.4	17.2
71	1	31.7	12	48.2	13.7	86	15.8	77.5	17.2
71	1	30.1	11.5	60.8	14.4	59.5	14.5	76.9	17.2
71	1	31.4	12	45.9	13.3	65.1	14.9	83.8	17.2
71	1	32.8	12.2	41.5	13.3	78.7	15.5	83.1	17.2
71	1	34.8	12.5	55.7	14.3	50.7	13.1	87.7	17.2
71	1	32.5	12	60.6	14.4	91	16	60.9	17.2
71	1	32.5	12.2	45.3	13.4	60.3	14.7	89.8	17.2
71	1	33.9	12.5	55.2	14.1	69.4	15.4	128.8	17.2
71	1	30.4	12	47.6	13.5	76.6	15.4	87.8	17.2
71	1	33.3	12.5	48.9	13.4	76.6	15.2	83	17.2
71	1	30.6	12	51.7	13.8	59.6	14.3	77.2	17.2
71	1	34.2	12.5	55.8	13.8	78.4	15.6	76.8	17.2
71	1	34.5	12.1	42.5	13	69.4	15	74.4	17.2
71	1	31.1	12	50.9	13.7	71.5	14.9	90.8	17.2
71	1	33.5	12	46.1	13.5	60.4	14.8	81.4	17.2
71	1	35.5	12.5	51.3	13.7	50.2	14.2	74.4	17.2
71	1	30.9	11.9	49.6	13.6	64.9	15.1	87.5	17.2
71	1	30.1	12	53.8	13.7	63.3	14.7	60.8	17.2
71	1	35.9	12.5	52.6	13.9	62.7	14.9	84.8	17.2
71	1	35.6	12.7	52.7	14	74.2	15.4	97.1	17.2
71	1	36.2	12.6	52	13.8	62.2	14.4	91.1	17.2
71	1	37	12.8	46.7	13.4	55.5	14	81.4	17.2
71	1	34.5	12.5	44.8	12.9	64.7	14.8	92.8	17.2
71	1	33.9	12.3	51.8	13.9	66.5	18	105.5	17.2
71	1	36.1	12.7	49.9	13.7	66.6	14.8	98.8	17.2
71	1	37	12.6	53.4	13.5	55.6	14.4	73.1	17.2
71	1	35.2	12.6	57	13.8	56.2	14.4	78.1	17.2
71	1	35.8	12.8	57.5	14	60.2	14.5	71.5	17.2
72	2	32.3	11.8	50.5	13.8	64.3	14.6	105.3	17.2
72	2	33.6	12.2	60	14.3	71	15	93.5	17.2
72	2	32.8	12	48.7	13.1	73.3	15	85.4	17.2
72	2	30	11.8	56.4	14	73	15.3	105.5	17.2
72	2	32.6	12.3	47.6	13.4	72.1	15	89.9	17.2
72	2	30.2	12	54.8	13.9	74	14.7	100.2	17.2
72	2	31.2	12.4	56.5	13.9	75.2	14.5	81	17.2
72	2	31.7	12	49.9	13.5	85.5	15.5	89.5	17.2
72	2	30.9	12	51.6	13.7	71.9	15.6	94	17.2
72	2	31.6	12.1	49.3	13.5	72.1	14.9	85.4	17.2
72	2	33.8	12.2	55.6	13.6	79.9	15.8	83.2	17.2
72	2	33.7	12	43.1	13.9	66.5	15.2	75	17.2
72	2	34.7	12	47.1	13	67.5	15.1	80.2	17.2
72	2	35	12	48.4	13.2	60.5	14.5	98.3	17.2
72	2	30	11.6	56.2	13.9	67.7	15.2	104.8	17.2
72	2	34.4	12.3	52.2	13.8	78.5	15.4	94.3	17.2
72	2	31.4	12	54.6	13.9	80.6	15.9	86.5	17.2
72	2	30.8	12	57.3	14.1	67.8	15.3	93.1	17.2
72	2	30	11.7	50.8	13.6	70	15	86.5	17.2
72	2	34.5	12	48.4	13.3	73.2	15.1	97.6	17.2
72	2	34.4	12.4	49.1	13.5	85.7	16	88.5	17.2
72	2	30	12	52.1	13.9	78.7	15.3	92.4	17.2
72	2	32.8	12.1	40.6	14	61.8	14.4	104.6	17.2
72	2	33.1	12.5	57.7	14.3	73.6	14.5	93.6	17.2
72	2	32.7	12	53.4	14	63.3	14.7	75	17.2
72	2	32.9	12.1	45.6	13.2	65.2	14.5	87.3	17.2
72	2	34.7	11.9	50.3	13.7	61.3	14.6	87.5	17.2
72	2	31.4	12	49	13.3	71.2	15.1	115.8	17.2
72	2	30.9	12.1	58.2	14.1	71.9	15.3	77.5	17.2
72	2	30.8	12.9	40.1	13	65.6	14.6	80.4	17.2
72	2	30	11.8	53.9	14.3	68.3	15	94.8	17.2
72	2	33.4	12.1	52.1	13.4	73.7	15.1	97.2	17.2
72	2	33.1	12.2	49.2	13.4	75.4	15.5	80.3	17.2
72	2	31.3	12.1	43.2	13	56.1	14.5	100.3	17.2
72	2	35.8	12.8	49.8	13.6	50	14	94	17.2
72	2	32.5	12.4	58.5	14.5	51.4	13.9	84.4	17.2
72	2	36	12.6	55.8	13.8	58.1	14.2	93.3	17.2
72	2	30.5	11.9	57.2	13.9	51.3	14.7	68.4	17.2
72	2	31.9	12.2	45.3	13.4	51.8	14.2	80.8	17.2
72	2	36.6	12.1	52.1	13.8	65	14.8	96.1	17.2
72	2	36.7	12.4	52.5	13.7	73.4	14.7	87.6	17.2
72	2	35.4	12.8	45.8	13.3	74.3	14.9	117.7	17.2
72	2	35.7	12.8	53.6	13.8	77.2	14.9	79.3	17.2
72	2	36.9	12.5	49.2	13.8	79	15.1	87.2	17.2
72	2	35	12.7	41.8	12.9	68.4	15	110	17.2
72	2	37	12.5	49.6	13.8	62.7	14.5	98.1	17.2
72	2	37	12.9	49.3	13.2	56.8	14.4	84.1	17.2
72	2	36	12.5	46.9	13.2	58.3	14	91.8	17.2
72	2	34.4	12.1	41.4	12.8	62.6	14.8	79.5	17.2
72	2	35.6	12.4	51.7	14.1	69.2	14.9	73.1	17.2
73	3	32.4	12.2	57.4	13.8	70.9	15	93.4	17.2
73	3	32.2	12	48.7	13.4	73.6	15	88.6	17.2
73	3	31.9	12.4	49.1	13.3	70.4	15.2	104.4	17.2
73	3	30.1	12.1	54.6	13.8	76.7	14	90.3	17.2
73	3	32.1	12.3	51.1	13.7	68	15	70.5	17.2
73	3	32.8	12.2	49.4	13.7	51.4	14	91.8	17.2
73	3	32.4	12	52.8	14.6	68.7	14.9	81.7	17.2
73	3	31.7	12	48.1	13	65.6	14.7	93.2	17.2
73	3	30.5	12.3	54.3	14	69	15	95	17.2
73	3	30.7	12	58.1	13.7	69.8	15	93.8	17.2
73	3	34.9	12.3	49.5	13.9	69.3	15	79.1	17.2
73	3	30	11.6	45	13.4	68.7	15	86.8	17.2
73	3	32.6	12.2	51.5	13.6	60.4	14.4	73.6	17.2
73	3	30	11	48.1	13.4	64.3	15	99.2	17.2
73	3	30.4	11.9	52	13.9	74.9	15.2	95.7	17.2
73	3	30	11.8	54.7	13.8	61.2	15	79.2	17.2
73	3	33.4	12.4	51.9	13.9	76.6	15	92.1	17.2
73	3	34.6	12.2	52	13.7	60.6	14.4	94.6	17.2
73	3	34.8	12.2	51.2	12.6	66.4	14.9	86.1	17.2
73	3	34.3	12.5	51.4	13.9	57.1	14.2	103.1	17.2
73	3	34.9	12.5	41.7	13	72.2	15.1	100.4	17.2
73	3	34.5	12.5	50.2	13.5	52.5	13.9	92.1	17.2
73	3	31.3	12.1	50.6	12.7	69.2	15.1	81	17.2
73	3	30.4	12	53.3	12.4	62.6	15	83.3	17.2
73	3	30	11.9	51.2	12.8	65.2	14.5	89.1	17.2
73	3	30.7	11.9	48.3	12.4	67.7	15	78.7	17.2
73	3	34.8	12	44.2	13.6	77	15.2	84.2	17.2
73	3	34.6	12.5	56.8	14	66.6	14.9	89.6	17.2
73	3	34.9	12.8	48.3	12.6	62.4	15	76.9	17.2
73	3	31.4	12	49.9	13.4	56.7	14.9	71.6	17.2
73	3	33.6	12.5	45	12.8	76.9	15.4	86.7	17.2
73	3	35.7	12.2	48.6	13.6	60.6	14.2	104.1	17.2
73	3	32.7	12	49.2	13.7	68.8	15.4	99.2	17.2
73	3	36.8	12.5	46.7	13.6	64.9	14.9	84.9	17.2
73	3	33.1	12.1	52.8	13.7	68	15	79	17.2
73	3	34.5	12.4	49.4	13.5	62.8	15	96.2	17.2
73	3	35.3	12.2	45	13.3	61.4	14.7	96.5	17.2
73	3	36.2	12.6	51.4	13.9	55.8	14.5	83.7	17.2
73	3	33.7	12.5	46.1	13.3	63.5	14.7	87.5	17.2
73	3	31.9	12	52.9	13.8	68.4	15.3	89.8	17.2
73	3	35.3	12.5	52.5	13.8	62.8	15	72.6	17.2
73	3	35.5	12.5	51.8	13.7	63.4	14.6	81.1	17.2
73	3	35.1	12.5	56.5	14.1	82.6	16	83.9	17.2
73	3	36.1	12.5	46.3	13.5	63.4	14.9	62.8	17.2
73	3	36.3	12.5	51.3	13.8	54.8	14.6	89.1	17.2
73	3	34.4	12.6	46	13.4	63.8	14.5	72.7	17.2
73	3	36.3	12.5	52.7	14	62.6	14.9	85.1	17.2
73	3	36.9	12.9	50.5	13.9	67	14.8	78.2	17.2
73	3	34.1	12.8	61.4	14.1	73.3	15.3		17.2
73	3	37	12.5						17.2
74	4	30.8	12.2	53.4	13.8	76	14.9	105.2	17.2
74	4	31	12	41.9	12.8	54.6	14.2	72.2	17.2
74	4	30.4	11.8	57.1	13.5	55.1	14.2	95.4	17.2
74	4	32.8	12	45.9	13.3	73.7	15.3	96.1	17.2
74	4	30.2	11.8	50.3	12.6	72.3	14.6	85.8	17.2
74	4	32.1	12.5	44.1	13	70.2	15	112.3	17.2
74	4	30.4	12.1	44.6	13	55.1	15	100.7	17.2
74	4	30	11.5	54.1	12.8	54.8	12.5	99.9	17.2
74	4	31.6	12.1	44.2	12.7	65.3	14.4	71.7	17.2
74	4	32.6	12	53.2	13.5	60.4	14.6	78.1	17.2
74	4	34.7	11.5	45.4	13.1	54.8	14.1	105.1	17.2
74	4	34.2	11.5	52.8	13.7	66.2	14.5	78.4	17.2
74	4	30	12.1	45.4	13.4	56.2	14	83.5	17.2
74	4	33.9	12.2	45	13.3	58.2	14.2	84	17.2
74	4	34.7	12.4	46.6	13.1	57.7	14.8	89.2	17.2
74	4	34.2	12	58.4	14.2	71.8	14.9	72.6	17.2
74	4	30	11.8	46.4	12.8	72.4	14.4	88	17.2
74	4	33.9	12.5	57.6	14.2	65.5	14.5	88	17.2
74	4	32.8	12.2	50.7	13.4	70.4	15	92.3	17.2
74	4	32.5	11.8	48.7	13.4	73.5	15.1	90.2	17.2
74	4	34.2	12	49.6	13.4	74.7	15.5	97.8	17.2
74	4	30.8	12	45.2	13.5	75	15.2	75.5	17.2
74	4	31.6	11.6	50.2	13.6	59.4	14.3	89.2	17.2
74	4	32.5	12	47.8	12.8	68.7	15.2	79.9	17.2
74	4	34.9	12	49	13.5	74.6	14.9	83.8	17.2
74	4	33.6	12.5	54.8	14	71.4	15.1	95.7	17.2
74	4	32.4	11.6	57.3	13.8	56.5	14.3	70.2	17.2
74	4	34.5	12.4	55	13.6	68.9	14.8	98.9	17.2
74	4	32.3	12	50.6	13.3	59.3	14.4	85.2	17.2
74	4	31.8	12	45.8	13	75.9	15.3	70.7	17.2
74	4	31.2	12	55.6	13.5	64.6	14.5	71	17.2
74	4	33.8	12.3	52.1	13.6	70.7	15.2	84.4	17.2
74	4	35.9	12.8	48.5	12.5	65	14.7	75	17.2
74	4	36.7	12.9	53.6	14.2	69.1	15.1	78.6	17.2
74	4	33.1	12.2	45.1	13.3	62.2	14.8	72.2	17.2
74	4	32.5	11.9	52.8	13.9	63.5	14.7	89.5	17.2
74	4	34.2	12.1	42.4	13.2	57.1	14.2	103.1	17.2
74	4	30.8	12.1	52.6	13.5	82.2	15.7	88.5	17.2
74	4	33.1	12	53.8	13.8	63.7	14.7	100.4	17.2
74	4	31.4	12	55.4	13.8	70.4	15.2	102.4	17.2
74	4	35.9	12.5	46.2	12.4	63.5	14.4	78.8	17.2
74	4	35.8	12.3	46.7	13.5	76.2	14.1	74.7	17.2
74	4	35.7	12.5	51.3	14	56.2	13.9	85.1	17.2
74	4	36	12.5	52.7	13.7	61.3	14.5	92.2	17.2
74	4	36	12.5	45.5	13.3	59.8	14.4	78.5	17.2
74	4	36	12.7	52.2	13.9	61.9	14.6	79.3	17.2
74	4	36.2	12.5	49.7	13.6	74.6	14.9	78.9	17.2
74	4	35.6	12.5	48.4	13.2	79.2	15.8	91.7	17.2
74	4	36	12.1	52.7	13.8	58.7	14.3	100.5	17.2
74	4	36.3	12.8	49.8	13.6				17.2
75	1	31	12	52.5	13.5	70.4	15.3	87.8	17.2
75	1	31.3	12	50.7	13.7	63	14.6	89.4	17.2
75	1	32	12	52.7	13.8	64.5	14.7	75.4	17.2
75	1	32.3	11.9	44.1	12.9	68.5	14.5	75	17.2
75	1	31.5	12	40.6	13	61.5	14.4	85.1	17.2
75	1	30	12	57	14	71.7	14.8	114.6	17.2
75	1	30.4	11.9	59.3	14.2	71.7	14.3	94.6	17.2
75	1	30.6	12	46.6	13.4	59.9	13.8	81.4	17.2
75	1	31.6	12	50.1	13.5	72	13.1	99.5	17.2
75	1	32.1	11.9	49	13.6	72.7	15	83.5	17.2
75	1	33.9	12.3	46.3	13.4	49.2	14.8	75	17.2
75	1	30.9	11.8	61.3	14.1	56.2	14	81.1	17.2
75	1	32.8	12	46.7	13.6	73.7	15.2	82.9	17.2
75	1	31.9	12	54.5	12.7	59.2	14.5	75.3	17.2
75	1	33.9	12.5	50.6	12.6	58.2	14.6	93.4	17.2
75	1	30.8	12	48.9	13.5	62	14.5	76.5	17.2
75	1	33	12	56	12.9	56.3	14.2	84.3	17.2
75	1	30	11.9	48.7	13.5	60.3	14.6	81.2	17.2
75	1	33.7	11.9	48.1	13.6	66	14.9	82.6	17.2
75	1	34.3	12	51.8	13.2	55.3	14.4	81.1	17.2
75	1	32	12	57	14.2	73.8	15.5	98.5	17.2
75	1	34.9	12.5	51.3	13.8	66.7	15.2	71.5	17.2
75	1	35	12.6	43.6	14.7	66	14.9	88.5	17.2
75	1	32.7	12	48.6	13.5	64.9	14.8	93.7	17.2
75	1	30.7	12.2	49.3	13.4	66.3	14.6	98.8	17.2
75	1	32.1	12.4	47	13.2	63.9	14.7	67.7	17.2
75	1	34.4	12	55.5	14.2	68.3	14.9	80.5	17.2
75	1	31.4	11.8	49.4	13.8	57.8	14.4	80.7	17.2
75	1	30	11.9	47.8	13.5	55.4	14	82.1	17.2
75	1	30.7	12	52.3	12.6	62.2	14.5	118.5	17.2
75	1	31.7	12.5	51.3	13.6	63.4	14.7	86.3	17.2
75	1	34.3	12.2	54.9	13.8	56.3	13.7	85.5	17.2
75	1	32.6	12.1	46.7	13.4	58.1	14.5	78.8	17.2
75	1	37	12.5	46.9	14.4	68.2	15	76.1	17.2
75	1	30.4	11.6	48.3	13.7	78	15.2	94.6	17.2
75	1	34.7	12.5	47.2	13.4	63	14.6	84.3	17.2
75	1	32.8	11.6	55.7	13.8	54.6	14.3	68	17.2
75	1	35.9	12.5	51.8	14.2	63.8	14.7	67.3	17.2
75	1	35	12.5	49	13.6	69.7	15	74.4	17.2
75	1	31.8	12	46.1	13	63.1	14.3	74.8	17.2
75	1	35.3	12	47.7	13.3	80.7	15.8	83.5	17.2
75	1	36.8	12.5	56.2	14.2	84.6	15.9	79.9	17.2
75	1	36.5	12.6	55.6	14	56.5	14.2	83.5	17.2
75	1	35	12.3	48.6	13.5	66.8	15	88.4	17.2
75	1	36	12.4	48.5	13.2	66.9	14.9	76.6	17.2
75	1	35.7	12.7	47.3	13.4	69.4	15.3	80.3	17.2
75	1	35.9	12.5	57.8	12.9	60.1	14.6	78.1	17.2
75	1	37	12.6	44	12.4	57.6	14.4	71.9	17.2
75	1	34.2	12.1	51.4	13.6	66.2	15	88.5	17.2
75	1	35.4	12.6	49.4	13.9	58.7	14.6		17.2
76	2	30.5	12	48.5	13	59.6	14.2	86.3	17.2
76	2	32.2	12.4	54.7	14	73.1	14.8	81.7	17.2
76	2	31.8	12.1	47.7	12.9	57.3	14	87.8	17.2
76	2	30.5	12	51.1	13.5	61.3	14.3	78.8	17.2
76	2	30	12	41.9	12.6	44.3	13.3	100	17.2
76	2	32.4	12.2	40.7	12.8	36.9	13	87.1	17.2
76	2	31.1	12	53.4	13.2	61.6	14.4	116.5	17.2
76	2	31.1	11.9	55.4	13.8	70.2	14.8	96.2	17.2
76	2	31.6	11.1	49.4	13	56	14	78.5	17.2
76	2	30.7	11.2	46.8	13.3	81.5	15.4	100.8	17.2
76	2	32.5	12	55.4	13.5	69.8	15	90.3	17.2
76	2	30.3	11.9	51.7	13.6	70.4	15	77.5	17.2
76	2	30.4	11.4	42	12.8	68.1	14.3	78.2	17.2
76	2	34.4	12.2	42.5	12.7	68.3	15	84.3	17.2
76	2	33.3	12	51.4	13.4	66.5	14.3	114.3	17.2
76	2	33.2	11.9	48.1	13.3	68.2	14.5	70.2	17.2
76	2	34.7	11.4	52.4	13.6	68.4	15.1	116.6	17.2
76	2	34.2	12.2	53.9	13.7	64.2	14.2	89.4	17.2
76	2	30.9	11.8	44.1	12.4	85.4	15.8	95.9	17.2
76	2	30	11.9	60.5	14.3	86.3	15.8	85.2	17.2
76	2	34.7	12.5	48.8	13.7	70	14.6	50.7	17.2
76	2	31.1	12	56.9	14.1	71.3	14.7	65.3	17.2
76	2	33.8	12.5	35.4	12.6	59.4	14.5	92.7	17.2
76	2	31.9	12	36.3	13	53.8	13.9	74.6	17.2
76	2	31.5	12.2	54	14	81.8	16.2	72	17.2
76	2	34	12.5	42.3	13	60.2	14.5	90.7	17.2
76	2	31.2	12.4	41.7	12.9	47.3	13.7	98.6	17.2
76	2	30.1	11.8	44.5	13.6	43.4	13.6	77.8	17.2
76	2	34.8	12.5	44.6	13.5	53.2	14.4		17.2
76	2	31.6	12	50.8	13.9	56.9	14.4	94	17.2
76	2	32.7	12	55.1	14	65.2	15	89.8	17.2
76	2	32.6	12	44	13.3	62	14.8	88.7	17.2
76	2	36.1	12	49.3	13.2	60.2	14.5	73.3	17.2
76	2	31.3	12	48	13.7	59.8	14.5	78.4	17.2
76	2	32.9	12.3	53.3	14	59.2	14.2	92.4	17.2
76	2	35.4	12.5	45.1	13.4	54.7	14	84.7	17.2
76	2	30.1	12	43.7	13	70.7	15.4	83.3	17.2
76	2	36.7	12.5	63.3	14.2	59.5	14.8	65.5	17.2
76	2	31.2	11.9	44.5	13	56.9	14.2	69.9	17.2
76	2	36.2	12.5	49.1	13.7	74.7	15.4	94.7	17.2
76	2	32.5	12	51.4	13.7	51.5	14	105.4	17.2
76	2	35	12.2	48.1	13.6	51	14.2	64.9	17.2
76	2	36.1	12.6	52.8	14	66.1	14.9	87.5	17.2
76	2	33.6	12.3	45.7	13.6	72.2	15.3	71.7	17.2
76	2	30.6	12	36.2	12.7	66.6	15	79.9	17.2
76	2	35.3	12.7	48	13.5	64.6	14.7	61.4	17.2
76	2	32.7	12.5	41.8	13.2	53.7	13.9	117.4	17.2
76	2	36.1	12.5	48.9	13.6	75.5	15.5	93.5	17.2
76	2	33.6	12.5	59.1	14.6	74.3	14.7	67.6	17.2
76	2	36	12.5	51.7	13.8	78.8	15.5	76.3	17.2
78	3	31.3	12	45.6	13.1	52.6	14	128.9	17.2
78	3	30.5	12.5	42.7	13	54.9	14	71.4	17.2
78	3	32.2	12	52	13.4	58.2	14	97.4	17.2
78	3	33.6	12.2	45.3	12.8	72.1	15.2	68.5	17.2
78	3	32.5	12.8	50.2	13.8	65.7	14.1	104.6	17.2
78	3	30.5	11.8	54.9	13.5	58.9	14.2	91.2	17.2
78	3	32.5	12	66.9	14.4	73.8	15	88.7	17.2
78	3	30.8	11.9	56.8	14.1	78.5	15	67.6	17.2
78	3	30	12.4	47.4	13.2	59.7	14.6	96.1	17.2
78	3	30	12.1	45.9	13	72.3	14.9	89.4	17.2
78	3	34.4	12.4	40.5	12.8	67.4	14.7	91.2	17.2
78	3	34.9	12.9	43.7	13.3	60.3	14.1	80.3	17.2
78	3	34.3	12.5	47.1	13.5	57.7	14	85.5	17.2
78	3	30.1	12	54.2	13.4	54.9	14.3	92.9	17.2
78	3	34.7	12.6	47	13.4	60	14.6	77	17.2
78	3	33.2	12.5	55	13.9	76.7	14.7	87.6	17.2
78	3	34.5	12.5	54.6	14.2	59.3	14.5	64.3	17.2
78	3	34.1	12.1	48.3	13.6	77.9	15.5	77.3	17.2
78	3	30	11.9	51.6	13.7	65.7	15	96.7	17.2
78	3	31.9	13.3	56.6	13.8	81.2	15.7	99.7	17.2
78	3	31.8	12	49.9	13.5	50.9	13.5	80.4	17.2
78	3	32.8	12	52.9	13.8	63.7	15	89.9	17.2
78	3	30	11.9	59.4	14.3	62.5	14.6	89	17.2
78	3	32.3	12.1	45.1	13.4	55.5	14.3	83	17.2
78	3	31.3	11.6	53.9	13.8	58.2	14.1	93.5	17.2
78	3	33.1	12.3	35.3	12.7	69.4	14.9	72.8	17.2
78	3	31.1	12	47.1	13.5	76.9	15	68.2	17.2
78	3	33.1	12.9	47.3	13.3	71.3	15.2	73.3	17.2
78	3	34.5	11.8	46.1	13.4	74.3	14	78.7	17.2
78	3	33.8	12.5	55.7	14	49.3	13.9	72.2	17.2
78	3	30.5	12	46.6	13	55.1	14	68.3	17.2
78	3	34.5	12.5	43.8	13	62	14.6	106	17.2
78	3	31	12	43.8	13	54.5	14.4	60.4	17.2
78	3	30.3	11.7	43.4	13.2	63.1	14.5	69.2	17.2
78	3	35.5	12.5	53.2	14	66.7	15.2	101.9	17.2
78	3	30	11.5	46.6	13.4	61.2	14.5	79	17.2
78	3	30	11.5	53.6	13.9	72.2	15.2	61.3	17.2
78	3	36.2	12.3	49.1	13.4	56.8	14.6	79.5	17.2
78	3	33.6	12	47	13.2	57.4	14.2	76.6	17.2
78	3	36.6	12.8	46.6	13.5	73.5	15.2	75	17.2
78	3	34.7	12.5	51.2	14	57.8	14.5	86.7	17.2
78	3	33.4	12.2	46.4	13.4	68	15	73.1	17.2
78	3	35.7	12.6	42.1	13.6	95.9	16.4	92.8	17.2
78	3	35.7	12.5	48.5	13.5	57.5	14.5	77.3	17.2
78	3	36.6	12.5	54.5	13.8	67.8	15	83.7	17.2
78	3	35.7	12.6	47.1	13.7	64.8	14.6	87.8	17.2
78	3	35	12.4	43.9	13.2	55.3	14.5	69.5	17.2
78	3	32.5	11.5	51.1	13.8	53.3	14	82.1	17.2
78	3	34	11.9	43.5	12	66.4	15	84.3	17.2
78	3	35.6	11.3	48.1	13.4				17.2
79	4	30.8	12	53	13.7	59.7	14.3	71.5	17.2
79	4	32.7	12.5	56.8	13.8	81.2	15.7	99.2	17.2
79	4	34	12.2	49.7	13.4	62	14.7	83.9	17.2
79	4	31.4	12	52.1	12.8	74.7	15.3	91.3	17.2
79	4	30	12.1	50.9	13.3	62.6	13.5	78.6	17.2
79	4	30.7	11.9	46.2	13.3	62.6	14.3	52.2	17.2
79	4	31.9	12	38.8	12.4	73.2	15.2	82.1	17.2
79	4	31.2	12.5	45.5	13.2	72.1	15	64.8	17.2
79	4	31	12.1	56.7	12.7	72.8	14.9	83.3	17.2
79	4	32.5	12.5	49.4	12.4	76.9	15.4	73.5	17.2
79	4	30.9	12	51.5	12.8	70.4	14.6	80.1	17.2
79	4	30	11.7	59.6	13.8	65.9	15	98	17.2
79	4	35	12.4	53.5	14.1	77.8	15.2	82.7	17.2
79	4	31.7	12	50.3	13.6	62.6	15	86.8	17.2
79	4	30	12	51.7	13.8	73.9	15.2	105.9	17.2
79	4	34.5	12.8	52	13.9	71.2	15.2	62.6	17.2
79	4	31.2	12	54.6	13.7	52.6	14.1	97.5	17.2
79	4	34.9	12.5	56.1	13.7	64.3	14.6	74.2	17.2
79	4	30	12	47.4	13.6	69.1	14.8	66	17.2
79	4	33.4	12	51.3	13.8	67.7	14.9	99.6	17.2
79	4	33.3	12	53	13.3	61.7	14.5	92.8	17.2
79	4	32.1	12	53.3	14	66	14.8	83.6	17.2
79	4	33.4	12	48.8	13.5	71.6	15.2	84	17.2
79	4	33.6	12.1	46.4	13.2	71.1	15.5	61.1	17.2
79	4	30	11.6	46.6	13.3	74.2	14.6	88.7	17.2
79	4	31.5	12	48.5	13.1	49.3	13.6	68.9	17.2
79	4	31.9	12.1	57.5	13.6	57.6	14.5	95.9	17.2
79	4	35	12	44.4	13	61.3	14.5	67.6	17.2
79	4	33.7	12.2	52.4	14.2	64.8	15.2	73.4	17.2
79	4	31.7	12	62.1	14.3	56.5	14.4	74.9	17.2
79	4	36.4	12.5	51.7	13.6	57.9	14.9	64	17.2
79	4	30.9	11.6	58.4	13.2	55.4	13.8	85.5	17.2
79	4	31.9	12	50.5	14	57.5	14.5	82.7	17.2
79	4	32	12	55.8	13.7	68.5	15	92.7	17.2
79	4	36.7	12.5	43.6	13	59.1	14.7	100.4	17.2
79	4	36.3	12.5	47.8	13.6	57.5	14	68.1	17.2
79	4	34.1	12.3	45.6	13.2	75.8	15	98.6	17.2
79	4	35.3	12.8	53.7	13.8	59	12.5	82	17.2
79	4	32.7	12	54.6	14	61.2	14.8	89.4	17.2
79	4	33.1	12	53.3	13.9	58.3	14.3	68.6	17.2
79	4	35.4	11.3	46.8	13.2	59.9	15.2	72.8	17.2
79	4	35.5	11.4	47.4	13.4	75.3	12.9	77.3	17.2
79	4	37	11.5	54.6	14	65.7	14.5	76.1	17.2
79	4	34.1	11.2	41.5	13	61	14.8	95	17.2
79	4	32.3	10.9	48.8	13.5	54.5	14.2	72.3	17.2
79	4	36.2	11.5	45.6	13.3	52.2	14.1	80.6	17.2
79	4	35.1	10.8	45.5	12.4	51.9	13.8	87.2	17.2
79	4	34.9	10.9	48.3	12.9	56.5	14.4	63	17.2
79	4	33.5	10.3	47.7	13.3	51.4	13.3	94.1	17.2
79	4	33.4	10.5	49.5	13.7	54.2	13.8	75.1	17.2
Media		32.9532	12.1517	50.6134	13.5298	66.1457	14.7681	86.5183	17.2
Std dev		2.05283	0.368724	4.87083	0.459992	8.7087	0.550319	13.0716	4.97795e-14

## Sheet: Fish weight&length Diet 1
PAPER:	Effect of oil from Camelina sativa on the growth performance, fatty acid profile and gut microbiome of gilthead Sea bream (Sparus aurata)
AUTHORS:	David Huyben, Simona Rimoldi, Chiara Ceccotti, Daniel Montero, Monica Betancor, Federica Iannini, Genciana Terova
CRITERIA:	Raw data for fish growth
TANK	DIET	WEIGHTi	LENGTHi	Week1	LF1	Week2	LF2	Week3	LF3
67	1	33.5	12	46.6	13	68.7	15	114.6	17.2
67	1	30.9	12	58.7	13.9	76.4	15.3	90.9	17.2
67	1	30.8	11.6	55.3	13.8	75.7	15.3	74.7	17.2
67	1	32.1	12	49.1	13.3	80	15.5	92.4	17.2
67	1	30.5	11.7	49.1	13.4	70.9	15	110.8	17.2
67	1	31.6	11.2	54.6	14	61.3	14.4	123.4	17.2
67	1	30	11.7	59.5	14.1	68.8	14.9	111	17.2
67	1	31.4	12	58.4	14.1	53.2	14	112.4	17.2
67	1	31.5	12	52.4	13.6	79.7	15.6	102.3	17.2
67	1	32.4	12.6	54.9	13.5	86	15.3	105.6	17.2
67	1	31.5	12	51.2	13.7	82.8	15.6	91.3	17.2
67	1	31.1	12.9	51.9	13.2	67.8	15.3	77.7	17.2
67	1	31.1	12.9	54.5	13.7	80.4	15.5	90.8	17.2
67	1	33	12.4	50.8	13.5	66.2	15.2	98.8	17.2
67	1	30.8	12.8	51.3	13.4	95.6	16.5	125.9	17.2
67	1	31.8	12	55.3	14.2	60.8	14.4	95.1	17.2
67	1	30.2	12	47.9	13.3	72.5	15.3	78.6	17.2
67	1	31	12	59.7	14.1	59.8	14.4	100.1	17.2
67	1	30.9	12.2	49.3	13.4	64.8	14.8	94.6	17.2
67	1	31.4	11.9	67.4	14.8	69.2	15.2	87.5	17.2
67	1	31.8	12	55.9	13.9	76.6	15.4	110.8	17.2
67	1	34	12	52	13.6	64.4	14.6	83.9	17.2
67	1	30	11.9	50.3	13.4	60.4	14.6	103.6	17.2
67	1	30.4	11.8	54	14	71	15	104.5	17.2
67	1	34.4	12.5	54.9	14	64.1	15.1	107	17.2
67	1	32.8	11.9	58	13.7	81	15.6	97.1	17.2
67	1	34.7	12.2	55.6	14	73.2	15.3	89	17.2
67	1	33.8	12.2	49.9	13.8	68.3	15	78.9	17.2
67	1	33.8	12.2	52.2	13.6	63.4	14.6	96.7	17.2
67	1	32.8	12	53.9	13.9	63.5	14.7	104.3	17.2
67	1	31.4	12	52.9	13.6	69.6	15	80.1	17.2
67	1	34.4	12.5	46.7	13.4	72.6	15.3	100.1	17.2
67	1	32.6	12.2	55.7	13.8	75.1	15.3	77.4	17.2
67	1	31	12	46.3	13.2	56.8	14	92.9	17.2
67	1	31.8	12	54.4	14	69.5	15.3	83	17.2
67	1	36.9	12.7	48	13.3	66.5	14.4	86.3	17.2
67	1	35.1	12.5	50.9	13.5	67	15.2	94.3	17.2
67	1	36.5	12.7	51.7	13.5	66.6	14.7	77.8	17.2
67	1	31.8	12.2	53.9	13.9	63.7	14.7	79.3	17.2
67	1	32.3	12	51.4	13.7	58.8	14.7	84.3	17.2
67	1	32.6	12.1	54.3	13.8	62.4	14.9	88.8	17.2
67	1	30.2	11.9	54.8	13.9	67.9	15.2	99.5	17.2
67	1	34.9	12.6	51.1	13.5	66.6	14.9	68.4	17.2
67	1	35	12.2	46.9	13.2	75.7	15.6	107.2	17.2
67	1	31	12	47.6	13.4	72	14.8	85.9	17.2
67	1	33.7	12	58.6	13	75	14.6	92.1	17.2
67	1	33.8	12.1	57.7	14	75.2	15.5	88.9	17.2
67	1	30.1	11.6	51.3	13.3	78.9	15	90.4	17.2
67	1	34	12.4	49.8	13.7	77.2	15.6	92.3	17.2
67	1	34.3	12.1	43.4	13.1	66.3	14.6		17.2
71	1	31.9	12.1	55.5	13.4	74.2	14.9	101.2	17.2
71	1	30.1	12	53.8	13.9	72.5	14.6	82.2	17.2
71	1	31.7	11.9	54	13.4	58.7	14.6	86.4	17.2
71	1	32.3	12	49.1	13.4	76.8	15	72	17.2
71	1	30.8	11.7	47.7	13.8	66.3	15	90.1	17.2
71	1	30.9	12	47.5	13.2	63.9	14.6	100.6	17.2
71	1	32.1	12.1	58.3	14.3	71.4	14.9	83.9	17.2
71	1	32.2	12.6	44.5	13.2	72.6	14.3	76.2	17.2
71	1	31.5	11.5	53.1	13.7	59.5	14.3	100.5	17.2
71	1	32	12.3	58	14.2	65.6	14.8	116.4	17.2
71	1	30.8	11.9	53.7	13.8	67.8	14.7	74.4	17.2
71	1	30.6	11.9	42.8	13.2	57.4	14.4	72.2	17.2
71	1	30.7	12	52.5	13.8	66.4	14.6	105.7	17.2
71	1	32.7	12.6	45.6	13	70.6	15.2	97.9	17.2
71	1	32.7	12.4	49	13.7	74.9	15.3	80.5	17.2
71	1	31.8	12.2	52.2	12.8	80	15.5	79.5	17.2
71	1	30.6	11.1	56.5	14.2	67.6	14.4	98.8	17.2
71	1	35.1	12.2	50.9	13.7	60.4	14.6	70.7	17.2
71	1	32.8	12.2	51.4	13.6	64.8	15	87.4	17.2
71	1	35	12	53.6	13.5	69.8	15.2	78	17.2
71	1	33.7	12.3	48.8	13.6	64.9	15.1	77.4	17.2
71	1	31.2	12	52.1	13.7	65.7	15	92.4	17.2
71	1	31.7	12	48.2	13.7	86	15.8	77.5	17.2
71	1	30.1	11.5	60.8	14.4	59.5	14.5	76.9	17.2
71	1	31.4	12	45.9	13.3	65.1	14.9	83.8	17.2
71	1	32.8	12.2	41.5	13.3	78.7	15.5	83.1	17.2
71	1	34.8	12.5	55.7	14.3	50.7	13.1	87.7	17.2
71	1	32.5	12	60.6	14.4	91	16	60.9	17.2
71	1	32.5	12.2	45.3	13.4	60.3	14.7	89.8	17.2
71	1	33.9	12.5	55.2	14.1	69.4	15.4	128.8	17.2
71	1	30.4	12	47.6	13.5	76.6	15.4	87.8	17.2
71	1	33.3	12.5	48.9	13.4	76.6	15.2	83	17.2
71	1	30.6	12	51.7	13.8	59.6	14.3	77.2	17.2
71	1	34.2	12.5	55.8	13.8	78.4	15.6	76.8	17.2
71	1	34.5	12.1	42.5	13	69.4	15	74.4	17.2
71	1	31.1	12	50.9	13.7	71.5	14.9	90.8	17.2
71	1	33.5	12	46.1	13.5	60.4	14.8	81.4	17.2
71	1	35.5	12.5	51.3	13.7	50.2	14.2	74.4	17.2
71	1	30.9	11.9	49.6	13.6	64.9	15.1	87.5	17.2
71	1	30.1	12	53.8	13.7	63.3	14.7	60.8	17.2
71	1	35.9	12.5	52.6	13.9	62.7	14.9	84.8	17.2
71	1	35.6	12.7	52.7	14	74.2	15.4	97.1	17.2
71	1	36.2	12.6	52	13.8	62.2	14.4	91.1	17.2
71	1	37	12.8	46.7	13.4	55.5	14	81.4	17.2
71	1	34.5	12.5	44.8	12.9	64.7	14.8	92.8	17.2
71	1	33.9	12.3	51.8	13.9	66.5	18	105.5	17.2
71	1	36.1	12.7	49.9	13.7	66.6	14.8	98.8	17.2
71	1	37	12.6	53.4	13.5	55.6	14.4	73.1	17.2
71	1	35.2	12.6	57	13.8	56.2	14.4	78.1	17.2
71	1	35.8	12.8	57.5	14	60.2	14.5	71.5	17.2
75	1	31	12	52.5	13.5	70.4	15.3	87.8	17.2
75	1	31.3	12	50.7	13.7	63	14.6	89.4	17.2
75	1	32	12	52.7	13.8	64.5	14.7	75.4	17.2
75	1	32.3	11.9	44.1	12.9	68.5	14.5	75	17.2
75	1	31.5	12	40.6	13	61.5	14.4	85.1	17.2
75	1	30	12	57	14	71.7	14.8	114.6	17.2
75	1	30.4	11.9	59.3	14.2	71.7	14.3	94.6	17.2
75	1	30.6	12	46.6	13.4	59.9	13.8	81.4	17.2
75	1	31.6	12	50.1	13.5	72	13.1	99.5	17.2
75	1	32.1	11.9	49	13.6	72.7	15	83.5	17.2
75	1	33.9	12.3	46.3	13.4	49.2	14.8	75	17.2
75	1	30.9	11.8	61.3	14.1	56.2	14	81.1	17.2
75	1	32.8	12	46.7	13.6	73.7	15.2	82.9	17.2
75	1	31.9	12	54.5	12.7	59.2	14.5	75.3	17.2
75	1	33.9	12.5	50.6	12.6	58.2	14.6	93.4	17.2
75	1	30.8	12	48.9	13.5	62	14.5	76.5	17.2
75	1	33	12	56	12.9	56.3	14.2	84.3	17.2
75	1	30	11.9	48.7	13.5	60.3	14.6	81.2	17.2
75	1	33.7	11.9	48.1	13.6	66	14.9	82.6	17.2
75	1	34.3	12	51.8	13.2	55.3	14.4	81.1	17.2
75	1	32	12	57	14.2	73.8	15.5	98.5	17.2
75	1	34.9	12.5	51.3	13.8	66.7	15.2	71.5	17.2
75	1	35	12.6	43.6	14.7	66	14.9	88.5	17.2
75	1	32.7	12	48.6	13.5	64.9	14.8	93.7	17.2
75	1	30.7	12.2	49.3	13.4	66.3	14.6	98.8	17.2
75	1	32.1	12.4	47	13.2	63.9	14.7	67.7	17.2
75	1	34.4	12	55.5	14.2	68.3	14.9	80.5	17.2
75	1	31.4	11.8	49.4	13.8	57.8	14.4	80.7	17.2
75	1	30	11.9	47.8	13.5	55.4	14	82.1	17.2
75	1	30.7	12	52.3	12.6	62.2	14.5	118.5	17.2
75	1	31.7	12.5	51.3	13.6	63.4	14.7	86.3	17.2
75	1	34.3	12.2	54.9	13.8	56.3	13.7	85.5	17.2
75	1	32.6	12.1	46.7	13.4	58.1	14.5	78.8	17.2
75	1	37	12.5	46.9	14.4	68.2	15	76.1	17.2
75	1	30.4	11.6	48.3	13.7	78	15.2	94.6	17.2
75	1	34.7	12.5	47.2	13.4	63	14.6	84.3	17.2
75	1	32.8	11.6	55.7	13.8	54.6	14.3	68	17.2
75	1	35.9	12.5	51.8	14.2	63.8	14.7	67.3	17.2
75	1	35	12.5	49	13.6	69.7	15	74.4	17.2
75	1	31.8	12	46.1	13	63.1	14.3	74.8	17.2
75	1	35.3	12	47.7	13.3	80.7	15.8	83.5	17.2
75	1	36.8	12.5	56.2	14.2	84.6	15.9	79.9	17.2
75	1	36.5	12.6	55.6	14	56.5	14.2	83.5	17.2
75	1	35	12.3	48.6	13.5	66.8	15	88.4	17.2
75	1	36	12.4	48.5	13.2	66.9	14.9	76.6	17.2
75	1	35.7	12.7	47.3	13.4	69.4	15.3	80.3	17.2
75	1	35.9	12.5	57.8	12.9	60.1	14.6	78.1	17.2
75	1	37	12.6	44	12.4	57.6	14.4	71.9	17.2
75	1	34.2	12.1	51.4	13.6	66.2	15	88.5	17.2
75	1	35.4	12.6	49.4	13.9	58.7	14.6		17.2
Media		32.7967	12.158	51.494	13.6147	67.2067	14.8653	87.875	17.2
Std dev		1.97373	0.327338	4.52586	0.41017	8.18659	0.569114	12.9332	1.06938e-14

## Sheet: Fish weight&length Diet 2
PAPER:	Effect of oil from Camelina sativa on the growth performance, fatty acid profile and gut microbiome of gilthead Sea bream (Sparus aurata)
AUTHORS:	David Huyben, Simona Rimoldi, Chiara Ceccotti, Daniel Montero, Monica Betancor, Federica Iannini, Genciana Terova
CRITERIA:	Raw data for fish growth
TANK	DIET	WEIGHTi	Lfi	W1	LF1	W2	LF2	W3	LF3
68	2	32	12.1	48.6	13.2	69.5	15	97	17.2
68	2	31.6	12	43.1	13	62.6	14.4	93.9	17.2
68	2	35	12.5	52.2	13.3	70.7	15.2	94.8	17.2
68	2	30.9	12	45.6	13	56.7	14	80.1	17.2
68	2	30.2	11.9	47	12.6	75.7	15.3	104.5	17.2
68	2	32	12	55.6	13.3	71	15	93	17.2
68	2	32.1	11.8	48.7	12.4	71.4	15.1	103.3	17.2
68	2	32.1	12.5	58.6	14.2	73.6	15.6	110.9	17.2
68	2	31.4	12	49.7	13.4	77.6	15	97	17.2
68	2	31.5	11.6	55.1	13.5	93.2	16	72.3	17.2
68	2	32.5	12.8	51.8	13.9	79.4	15.5	73.5	17.2
68	2	32.7	12.1	56.8	14.4	77.6	14.6	98.3	17.2
68	2	31.8	12.5	48.6	13.4	66.9	15.1	79.2	17.2
68	2	30.3	11.4	49.1	12.4	68.2	14.9	75.7	17.2
68	2	33.2	11.5	64.2	14.3	60.7	14.2	124.8	17.2
68	2	32.6	12.2	50.5	12.1	70.6	15	89.9	17.2
68	2	31.8	12.1	54.8	14	62.8	14.6	90.7	17.2
68	2	31.3	12.1	56.4	14	66	14.8	75.1	17.2
68	2	33.2	12	54	14	61	15	176.3	17.2
68	2	32.1	11.8	52.9	13.6	62	14	89.4	17.2
68	2	30	11.8	53.7	13.8	72	15.2	99.9	17.2
68	2	31.6	12.1	54.9	13.7	73.9	15.3	75.5	17.2
68	2	34	12.8	53.6	13.7	57.5	14.4	84.3	17.2
68	2	31.2	12	49.4	13.4	82.9	15.7	86.4	17.2
68	2	30	11.9	54.8	13.9	88.2	15.6	88.2	17.2
68	2	33.3	12.2	54.8	14	68.3	15	87.7	17.2
68	2	32.7	12.4	60.7	14.1	88.9	15.1	90.6	17.2
68	2	31.8	12	56.8	14.2	56.3	14.2	78.8	17.2
68	2	31.6	12	49.5	13.5	70.8	14.9	91	17.2
68	2	35	12	55.4	13.8	83.5	15.7	96.3	17.2
68	2	30.5	11.8	50.9	13.7	73.2	15.3	93.1	17.2
68	2	36.9	12.8	53.6	13.5	77.1	15.8	79.9	17.2
68	2	36.1	12.8	48.6	13.5	71.1	15.6	45.8	17.2
68	2	36.2	12.6	50	13.5	70.8	15.3	90.6	17.2
68	2	35.3	12.2	54	13.8	58.6	14.6	97	17.2
68	2	31.7	12	50.5	13.6	63.6	14.7	73.1	17.2
68	2	34.3	12.5	57.8	14.3	51.8	13.7	89.3	17.2
68	2	33.8	12	54.5	13.9	89.4	15	104.3	17.2
68	2	30.9	12	48.1	12.7	67.7	14.9	80.3	17.2
68	2	31.1	12	51.2	13.8	79.3	15.3	92.7	17.2
68	2	33.4	12	54.5	13.9	51	14.4	112.9	17.2
68	2	34.7	12.5	40.2	13.7	61.2	14.1	96.6	17.2
68	2	35.6	12.5	61.4	14.2	70.8	15.1	79.8	17.2
68	2	33.7	12	49.4	13.3	70.6	15	101.6	17.2
68	2	35.1	12.5	49.2	12.5	56.1	14.2	115	17.2
68	2	30	12	52.3	12.9	63.2	14.9	94.5	17.2
68	2	30.5	11.5	42.5	12.5	71.6	14.7	82.7	17.2
68	2	30.8	12	50.5	13.6	55.1	14.8	92.8	17.2
68	2	31.8	12	41.5	12.9	76.9	15.1	95.6	17.2
68	2	31	11.6	57.2	14	69	15	77.4	17.2
72	2	32.3	11.8	50.5	13.8	64.3	14.6	105.3	17.2
72	2	33.6	12.2	60	14.3	71	15	93.5	17.2
72	2	32.8	12	48.7	13.1	73.3	15	85.4	17.2
72	2	30	11.8	56.4	14	73	15.3	105.5	17.2
72	2	32.6	12.3	47.6	13.4	72.1	15	89.9	17.2
72	2	30.2	12	54.8	13.9	74	14.7	100.2	17.2
72	2	31.2	12.4	56.5	13.9	75.2	14.5	81	17.2
72	2	31.7	12	49.9	13.5	85.5	15.5	89.5	17.2
72	2	30.9	12	51.6	13.7	71.9	15.6	94	17.2
72	2	31.6	12.1	49.3	13.5	72.1	14.9	85.4	17.2
72	2	33.8	12.2	55.6	13.6	79.9	15.8	83.2	17.2
72	2	33.7	12	43.1	13.9	66.5	15.2	75	17.2
72	2	34.7	12	47.1	13	67.5	15.1	80.2	17.2
72	2	35	12	48.4	13.2	60.5	14.5	98.3	17.2
72	2	30	11.6	56.2	13.9	67.7	15.2	104.8	17.2
72	2	34.4	12.3	52.2	13.8	78.5	15.4	94.3	17.2
72	2	31.4	12	54.6	13.9	80.6	15.9	86.5	17.2
72	2	30.8	12	57.3	14.1	67.8	15.3	93.1	17.2
72	2	30	11.7	50.8	13.6	70	15	86.5	17.2
72	2	34.5	12	48.4	13.3	73.2	15.1	97.6	17.2
72	2	34.4	12.4	49.1	13.5	85.7	16	88.5	17.2
72	2	30	12	52.1	13.9	78.7	15.3	92.4	17.2
72	2	32.8	12.1	40.6	14	61.8	14.4	104.6	17.2
72	2	33.1	12.5	57.7	14.3	73.6	14.5	93.6	17.2
72	2	32.7	12	53.4	14	63.3	14.7	75	17.2
72	2	32.9	12.1	45.6	13.2	65.2	14.5	87.3	17.2
72	2	34.7	11.9	50.3	13.7	61.3	14.6	87.5	17.2
72	2	31.4	12	49	13.3	71.2	15.1	115.8	17.2
72	2	30.9	12.1	58.2	14.1	71.9	15.3	77.5	17.2
72	2	30.8	12.9	40.1	13	65.6	14.6	80.4	17.2
72	2	30	11.8	53.9	14.3	68.3	15	94.8	17.2
72	2	33.4	12.1	52.1	13.4	73.7	15.1	97.2	17.2
72	2	33.1	12.2	49.2	13.4	75.4	15.5	80.3	17.2
72	2	31.3	12.1	43.2	13	56.1	14.5	100.3	17.2
72	2	35.8	12.8	49.8	13.6	50	14	94	17.2
72	2	32.5	12.4	58.5	14.5	51.4	13.9	84.4	17.2
72	2	36	12.6	55.8	13.8	58.1	14.2	93.3	17.2
72	2	30.5	11.9	57.2	13.9	51.3	14.7	68.4	17.2
72	2	31.9	12.2	45.3	13.4	51.8	14.2	80.8	17.2
72	2	36.6	12.1	52.1	13.8	65	14.8	96.1	17.2
72	2	36.7	12.4	52.5	13.7	73.4	14.7	87.6	17.2
72	2	35.4	12.8	45.8	13.3	74.3	14.9	117.7	17.2
72	2	35.7	12.8	53.6	13.8	77.2	14.9	79.3	17.2
72	2	36.9	12.5	49.2	13.8	79	15.1	87.2	17.2
72	2	35	12.7	41.8	12.9	68.4	15	110	17.2
72	2	37	12.5	49.6	13.8	62.7	14.5	98.1	17.2
72	2	37	12.9	49.3	13.2	56.8	14.4	84.1	17.2
72	2	36	12.5	46.9	13.2	58.3	14	91.8	17.2
72	2	34.4	12.1	41.4	12.8	62.6	14.8	79.5	17.2
72	2	35.6	12.4	51.7	14.1	69.2	14.9	73.1	17.2
76	2	30.5	12	48.5	13	59.6	14.2	86.3	17.2
76	2	32.2	12.4	54.7	14	73.1	14.8	81.7	17.2
76	2	31.8	12.1	47.7	12.9	57.3	14	87.8	17.2
76	2	30.5	12	51.1	13.5	61.3	14.3	78.8	17.2
76	2	30	12	41.9	12.6	44.3	13.3	100	17.2
76	2	32.4	12.2	40.7	12.8	36.9	13	87.1	17.2
76	2	31.1	12	53.4	13.2	61.6	14.4	116.5	17.2
76	2	31.1	11.9	55.4	13.8	70.2	14.8	96.2	17.2
76	2	31.6	11.1	49.4	13	56	14	78.5	17.2
76	2	30.7	11.2	46.8	13.3	81.5	15.4	100.8	17.2
76	2	32.5	12	55.4	13.5	69.8	15	90.3	17.2
76	2	30.3	11.9	51.7	13.6	70.4	15	77.5	17.2
76	2	30.4	11.4	42	12.8	68.1	14.3	78.2	17.2
76	2	34.4	12.2	42.5	12.7	68.3	15	84.3	17.2
76	2	33.3	12	51.4	13.4	66.5	14.3	114.3	17.2
76	2	33.2	11.9	48.1	13.3	68.2	14.5	70.2	17.2
76	2	34.7	11.4	52.4	13.6	68.4	15.1	116.6	17.2
76	2	34.2	12.2	53.9	13.7	64.2	14.2	89.4	17.2
76	2	30.9	11.8	44.1	12.4	85.4	15.8	95.9	17.2
76	2	30	11.9	60.5	14.3	86.3	15.8	85.2	17.2
76	2	34.7	12.5	48.8	13.7	70	14.6	50.7	17.2
76	2	31.1	12	56.9	14.1	71.3	14.7	65.3	17.2
76	2	33.8	12.5	35.4	12.6	59.4	14.5	92.7	17.2
76	2	31.9	12	36.3	13	53.8	13.9	74.6	17.2
76	2	31.5	12.2	54	14	81.8	16.2	72	17.2
76	2	34	12.5	42.3	13	60.2	14.5	90.7	17.2
76	2	31.2	12.4	41.7	12.9	47.3	13.7	98.6	17.2
76	2	30.1	11.8	44.5	13.6	43.4	13.6	77.8	17.2
76	2	34.8	12.5	44.6	13.5	53.2	14.4		17.2
76	2	31.6	12	50.8	13.9	56.9	14.4	94	17.2
76	2	32.7	12	55.1	14	65.2	15	89.8	17.2
76	2	32.6	12	44	13.3	62	14.8	88.7	17.2
76	2	36.1	12	49.3	13.2	60.2	14.5	73.3	17.2
76	2	31.3	12	48	13.7	59.8	14.5	78.4	17.2
76	2	32.9	12.3	53.3	14	59.2	14.2	92.4	17.2
76	2	35.4	12.5	45.1	13.4	54.7	14	84.7	17.2
76	2	30.1	12	43.7	13	70.7	15.4	83.3	17.2
76	2	36.7	12.5	63.3	14.2	59.5	14.8	65.5	17.2
76	2	31.2	11.9	44.5	13	56.9	14.2	69.9	17.2
76	2	36.2	12.5	49.1	13.7	74.7	15.4	94.7	17.2
76	2	32.5	12	51.4	13.7	51.5	14	105.4	17.2
76	2	35	12.2	48.1	13.6	51	14.2	64.9	17.2
76	2	36.1	12.6	52.8	14	66.1	14.9	87.5	17.2
76	2	33.6	12.3	45.7	13.6	72.2	15.3	71.7	17.2
76	2	30.6	12	36.2	12.7	66.6	15	79.9	17.2
76	2	35.3	12.7	48	13.5	64.6	14.7	61.4	17.2
76	2	32.7	12.5	41.8	13.2	53.7	13.9	117.4	17.2
76	2	36.1	12.5	48.9	13.6	75.5	15.5	93.5	17.2
76	2	33.6	12.5	59.1	14.6	74.3	14.7	67.6	17.2
76	2	36	12.5	51.7	13.8	78.8	15.5	76.3	17.2
Media		32.812	12.1407	50.432	13.53	67.3693	14.812	89.2718	17.2
Std dev		2.01294	0.337797	5.51469	0.496396	9.99752	0.564607	14.8945	1.06938e-14

## Sheet: Fish weight&length Diet 3
PAPER:	Effect of oil from Camelina sativa on the growth performance, fatty acid profile and gut microbiome of gilthead Sea bream (Sparus aurata)
AUTHORS:	David Huyben, Simona Rimoldi, Chiara Ceccotti, Daniel Montero, Monica Betancor, Federica Iannini, Genciana Terova
CRITERIA:	Raw data for fish growth
TANK	DIET	WEIGHTi	Lfi	Week1	LF1	Week2	LF2	Week3	LF3
69	3	30	12	37.7	12.9	77.5	15.1	73.5	17.2
69	3	31.9	12.4	63.5	14.7	69.3	15	82.6	17.2
69	3	31.2	12	47.7	13.5	61.1	14.5	80.3	17.2
69	3	31.2	12	45.2	12.3	61.4	14.5	98.8	17.2
69	3	30	12	52.3	13.5	88.5	16	72.4	17.2
69	3	31.5	12	53.2	13.5	60.1	14.5	118	17.2
69	3	30	11.9	49.6	13.6	55.8	13.8	76.3	17.2
69	3	30	12	51.7	13.8	74.1	15.1	84	17.2
69	3	32.9	12.2	48.7	13.4	72	15	75.2	17.2
69	3	31.9	12.1	52.4	14.1	74.1	15	83.3	17.2
69	3	30.5	12.1	52.8	13.8	82.8	15.6	83.2	17.2
69	3	30.9	12	48.5	13.7	77	15.5	68.5	17.2
69	3	32.8	12.2	45.7	14	81.9	15.3	76.6	17.2
69	3	33.3	12.2	43.6	13.4	69.7	15.2	82.1	17.2
69	3	31.5	12.9	53.1	13.9	57.5	14.4	91.2	17.2
69	3	33.2	12.2	43	13.3	58.5	14.6	73.5	17.2
69	3	30.3	12	42.1	13.3	61.4	14.7	91	17.2
69	3	30	11.8	52.3	12.8	66.3	14.9	76.8	17.2
69	3	31.8	12.1	55.1	13.7	76.1	15.5	113.8	17.2
69	3	30.6	12	51.1	13.8	48	13.8	85.7	17.2
69	3	30.3	12	59.1	14.2	62.9	14.6	76.6	17.2
69	3	30.9	11.6	46.4	13.6	48	13.7	106	17.2
69	3	30	11.9	46.6	13.7	64.5	14.7	77.8	17.2
69	3	30.8	12	49.9	13.2	62.2	14.6	92	17.2
69	3	34.6	12.3	47.5	13	54	14.3	94.8	17.2
69	3	33.9	12.2	55.4	13.9	56.2	14.1	79.9	17.2
69	3	30.1	12	49	13.4	84.2	15.3	97	17.2
69	3	34.8	12.1	55.7	14.2	67.5	15	79.6	17.2
69	3	34.6	12.4	53.2	13.7	53.8	14.3	96.4	17.2
69	3	31.5	12	49.7	13.6	57.5	14.4	100.7	17.2
69	3	32.7	12.2	54	13.8	58.3	14.4	78.2	17.2
69	3	30.3	11.5	49.8	13.6	53.5	14.2	92.6	17.2
69	3	35.7	12.5	48.1	12.7	73.5	15.6	72.8	17.2
69	3	34.1	12.4	55.9	14.1	64.5	14.7	79.3	17.2
69	3	34.2	12.4	53.3	14	70.7	15.2	83.9	17.2
69	3	35.5	12.3	47.2	13.5	60.1	14.5	87.7	17.2
69	3	32	12.1	44.6	12.8	68.9	15	75.8	17.2
69	3	33.7	12.3	47.6	13.6	59.8	14	99.4	17.2
69	3	32.3	12	43.6	12.9	73.1	15.1	114.9	17.2
69	3	34	12.5	49.5	13.8	72.6	14.9	76.3	17.2
69	3	30.5	12	54.2	12.6	64.4	14.7	80.7	17.2
69	3	35.9	12.9	57	14.3	65.1	15	80.8	17.2
69	3	36	12.8	51.5	13.6	62.1	14.9	105.5	17.2
69	3	35	12.4	49.8	13.5	64.8	14.7	94.4	17.2
69	3	36.5	12.5	57.1	14	61.9	15	73.4	17.2
69	3	35.8	12.6	50.1	13.5	65.6	14.7	59.7	17.2
69	3	36.1	12.6	51.3	13.8	64.1	15.6	81.7	17.2
69	3	36.8	12.6	53.6	13.8	64.5	14.8	71	17.2
69	3	34.6	12	48.1	13.4	60.3	14.4	73.6	17.2
69	3	37	12.5						17.2
73	3	32.4	12.2	57.4	13.8	70.9	15	93.4	17.2
73	3	32.2	12	48.7	13.4	73.6	15	88.6	17.2
73	3	31.9	12.4	49.1	13.3	70.4	15.2	104.4	17.2
73	3	30.1	12.1	54.6	13.8	76.7	14	90.3	17.2
73	3	32.1	12.3	51.1	13.7	68	15	70.5	17.2
73	3	32.8	12.2	49.4	13.7	51.4	14	91.8	17.2
73	3	32.4	12	52.8	14.6	68.7	14.9	81.7	17.2
73	3	31.7	12	48.1	13	65.6	14.7	93.2	17.2
73	3	30.5	12.3	54.3	14	69	15	95	17.2
73	3	30.7	12	58.1	13.7	69.8	15	93.8	17.2
73	3	34.9	12.3	49.5	13.9	69.3	15	79.1	17.2
73	3	30	11.6	45	13.4	68.7	15	86.8	17.2
73	3	32.6	12.2	51.5	13.6	60.4	14.4	73.6	17.2
73	3	30	11	48.1	13.4	64.3	15	99.2	17.2
73	3	30.4	11.9	52	13.9	74.9	15.2	95.7	17.2
73	3	30	11.8	54.7	13.8	61.2	15	79.2	17.2
73	3	33.4	12.4	51.9	13.9	76.6	15	92.1	17.2
73	3	34.6	12.2	52	13.7	60.6	14.4	94.6	17.2
73	3	34.8	12.2	51.2	12.6	66.4	14.9	86.1	17.2
73	3	34.3	12.5	51.4	13.9	57.1	14.2	103.1	17.2
73	3	34.9	12.5	41.7	13	72.2	15.1	100.4	17.2
73	3	34.5	12.5	50.2	13.5	52.5	13.9	92.1	17.2
73	3	31.3	12.1	50.6	12.7	69.2	15.1	81	17.2
73	3	30.4	12	53.3	12.4	62.6	15	83.3	17.2
73	3	30	11.9	51.2	12.8	65.2	14.5	89.1	17.2
73	3	30.7	11.9	48.3	12.4	67.7	15	78.7	17.2
73	3	34.8	12	44.2	13.6	77	15.2	84.2	17.2
73	3	34.6	12.5	56.8	14	66.6	14.9	89.6	17.2
73	3	34.9	12.8	48.3	12.6	62.4	15	76.9	17.2
73	3	31.4	12	49.9	13.4	56.7	14.9	71.6	17.2
73	3	33.6	12.5	45	12.8	76.9	15.4	86.7	17.2
73	3	35.7	12.2	48.6	13.6	60.6	14.2	104.1	17.2
73	3	32.7	12	49.2	13.7	68.8	15.4	99.2	17.2
73	3	36.8	12.5	46.7	13.6	64.9	14.9	84.9	17.2
73	3	33.1	12.1	52.8	13.7	68	15	79	17.2
73	3	34.5	12.4	49.4	13.5	62.8	15	96.2	17.2
73	3	35.3	12.2	45	13.3	61.4	14.7	96.5	17.2
73	3	36.2	12.6	51.4	13.9	55.8	14.5	83.7	17.2
73	3	33.7	12.5	46.1	13.3	63.5	14.7	87.5	17.2
73	3	31.9	12	52.9	13.8	68.4	15.3	89.8	17.2
73	3	35.3	12.5	52.5	13.8	62.8	15	72.6	17.2
73	3	35.5	12.5	51.8	13.7	63.4	14.6	81.1	17.2
73	3	35.1	12.5	56.5	14.1	82.6	16	83.9	17.2
73	3	36.1	12.5	46.3	13.5	63.4	14.9	62.8	17.2
73	3	36.3	12.5	51.3	13.8	54.8	14.6	89.1	17.2
73	3	34.4	12.6	46	13.4	63.8	14.5	72.7	17.2
73	3	36.3	12.5	52.7	14	62.6	14.9	85.1	17.2
73	3	36.9	12.9	50.5	13.9	67	14.8	78.2	17.2
73	3	34.1	12.8	61.4	14.1	73.3	15.3		17.2
73	3	37	12.5						17.2
78	3	31.3	12	45.6	13.1	52.6	14	128.9	17.2
78	3	30.5	12.5	42.7	13	54.9	14	71.4	17.2
78	3	32.2	12	52	13.4	58.2	14	97.4	17.2
78	3	33.6	12.2	45.3	12.8	72.1	15.2	68.5	17.2
78	3	32.5	12.8	50.2	13.8	65.7	14.1	104.6	17.2
78	3	30.5	11.8	54.9	13.5	58.9	14.2	91.2	17.2
78	3	32.5	12	66.9	14.4	73.8	15	88.7	17.2
78	3	30.8	11.9	56.8	14.1	78.5	15	67.6	17.2
78	3	30	12.4	47.4	13.2	59.7	14.6	96.1	17.2
78	3	30	12.1	45.9	13	72.3	14.9	89.4	17.2
78	3	34.4	12.4	40.5	12.8	67.4	14.7	91.2	17.2
78	3	34.9	12.9	43.7	13.3	60.3	14.1	80.3	17.2
78	3	34.3	12.5	47.1	13.5	57.7	14	85.5	17.2
78	3	30.1	12	54.2	13.4	54.9	14.3	92.9	17.2
78	3	34.7	12.6	47	13.4	60	14.6	77	17.2
78	3	33.2	12.5	55	13.9	76.7	14.7	87.6	17.2
78	3	34.5	12.5	54.6	14.2	59.3	14.5	64.3	17.2
78	3	34.1	12.1	48.3	13.6	77.9	15.5	77.3	17.2
78	3	30	11.9	51.6	13.7	65.7	15	96.7	17.2
78	3	31.9	13.3	56.6	13.8	81.2	15.7	99.7	17.2
78	3	31.8	12	49.9	13.5	50.9	13.5	80.4	17.2
78	3	32.8	12	52.9	13.8	63.7	15	89.9	17.2
78	3	30	11.9	59.4	14.3	62.5	14.6	89	17.2
78	3	32.3	12.1	45.1	13.4	55.5	14.3	83	17.2
78	3	31.3	11.6	53.9	13.8	58.2	14.1	93.5	17.2
78	3	33.1	12.3	35.3	12.7	69.4	14.9	72.8	17.2
78	3	31.1	12	47.1	13.5	76.9	15	68.2	17.2
78	3	33.1	12.9	47.3	13.3	71.3	15.2	73.3	17.2
78	3	34.5	11.8	46.1	13.4	74.3	14	78.7	17.2
78	3	33.8	12.5	55.7	14	49.3	13.9	72.2	17.2
78	3	30.5	12	46.6	13	55.1	14	68.3	17.2
78	3	34.5	12.5	43.8	13	62	14.6	106	17.2
78	3	31	12	43.8	13	54.5	14.4	60.4	17.2
78	3	30.3	11.7	43.4	13.2	63.1	14.5	69.2	17.2
78	3	35.5	12.5	53.2	14	66.7	15.2	101.9	17.2
78	3	30	11.5	46.6	13.4	61.2	14.5	79	17.2
78	3	30	11.5	53.6	13.9	72.2	15.2	61.3	17.2
78	3	36.2	12.3	49.1	13.4	56.8	14.6	79.5	17.2
78	3	33.6	12	47	13.2	57.4	14.2	76.6	17.2
78	3	36.6	12.8	46.6	13.5	73.5	15.2	75	17.2
78	3	34.7	12.5	51.2	14	57.8	14.5	86.7	17.2
78	3	33.4	12.2	46.4	13.4	68	15	73.1	17.2
78	3	35.7	12.6	42.1	13.6	95.9	16.4	92.8	17.2
78	3	35.7	12.5	48.5	13.5	57.5	14.5	77.3	17.2
78	3	36.6	12.5	54.5	13.8	67.8	15	83.7	17.2
78	3	35.7	12.6	47.1	13.7	64.8	14.6	87.8	17.2
78	3	35	12.4	43.9	13.2	55.3	14.5	69.5	17.2
78	3	32.5	11.5	51.1	13.8	53.3	14	82.1	17.2
78	3	34	11.9	43.5	12	66.4	15	84.3	17.2
78	3	35.6	11.3	48.1	13.4				17.2
Media		33.016	12.2173	49.9912	13.523	65.315	14.7558	85.0226	17.2
Std dev		2.15388	0.349832	4.77193	0.461599	8.40536	0.489636	11.9378	1.06938e-14

## Sheet: Fish weight&length Diet 4
PAPER:	Effect of oil from Camelina sativa on the growth performance, fatty acid profile and gut microbiome of gilthead Sea bream (Sparus aurata)
AUTHORS:	David Huyben, Simona Rimoldi, Chiara Ceccotti, Daniel Montero, Monica Betancor, Federica Iannini, Genciana Terova
CRITERIA:	Raw data for fish growth
TANK	DIET	WEIGHTi	Lfi	W1	LF1	W2	LF2	W3	LF3
70	4	31.5	12.1	58.9	13.9	71.1	15	80.7	17.2
70	4	32.1	12	53.5	13.6	77.4	15	89.7	17.2
70	4	33.1	12	51.5	13.6	52.7	14.5	76.2	17.2
70	4	31.9	11.8	47.9	12.6	57.7	14.9	87	17.2
70	4	30.1	12	53	12.7	60.6	14.6	102.6	17.2
70	4	30.9	12	50.2	13.1	60.9	15.3	72.3	17.2
70	4	31.4	11.1	44.8	12.9	54.3	14.4	84	17.2
70	4	32.2	12.1	52	14	82.3	15.8	67	17.2
70	4	32.4	12	52.8	14	75.9	15.2	80.4	17.2
70	4	31.1	11.8	55.5	13.8	60.5	14	77.2	17.2
70	4	32.9	12	45.7	13.3	60.2	14.1	74.2	17.2
70	4	31.4	11.9	51.7	12.6	71	14.8	74	17.2
70	4	31.4	12	54.6	12.2	55.4	14	95.8	17.2
70	4	30.1	12	52.3	13.6	57.6	14.2	97.4	17.2
70	4	31.2	12	46.2	13.4	59.6	14.7	88.2	17.2
70	4	31.3	11.9	57	13.7	66.9	15	80.7	17.2
70	4	33	12.5	49.5	13.7	67.3	14.7	80.2	17.2
70	4	31	12	49.3	13.4	77	15.3	89.3	17.2
70	4	32.2	12.1	47.8	13.5	65.4	14.6	78.7	17.2
70	4	32.5	12.4	54.3	14.2	54.1	14.3	109.8	17.2
70	4	30	11.8	44.1	13	56.8	14.4	77.4	17.2
70	4	32.4	12.1	45.7	13.5	68.1	15	101.7	17.2
70	4	30	11.7	54	13.8	69.1	15	76.2	17.2
70	4	32.7	12.4	51.4	13.7	59	14.5	71.4	17.2
70	4	33.6	12.2	49.2	13.3	65.5	15	86.5	17.2
70	4	34.5	12.5	46.7	13.5	67.5	14.9	78.5	17.2
70	4	32	12.1	44.5	13.5	52.4	14.7	83.4	17.2
70	4	30.9	12	53.8	13.7	60.1	14.2	85.7	17.2
70	4	34.7	12.4	54.9	13.8	58.8	14.4	81.1	17.2
70	4	31.9	12.3	51.9	13.6	62.6	14.7	83	17.2
70	4	33.7	12	46.8	13.3	61.4	14.4	73.7	17.2
70	4	34.8	12.1	51	13.8	61.1	14	77.2	17.2
70	4	37	12.8	44.7	13	70.6	15	110.8	17.2
70	4	36.2	12.5	60.7	14.3	65	14.6	92.7	17.2
70	4	33.6	12.2	58.6	14	65.6	14.9	106.7	17.2
70	4	34.4	12.3	42.3	12.8	51.7	14	75.2	17.2
70	4	32	11.8	53.8	13.8	55	14.2	101.6	17.2
70	4	36.6	12.6	48.5	13.5	78.2	15.5	75.9	17.2
70	4	33.6	12.7	54.3	14.2	63.2	14.7	87.5	17.2
70	4	33.7	12.1	49.2	13.5	61.4	14.5	90.8	17.2
70	4	37	12.8	44	13.7	67	14.8	72.4	17.2
70	4	36.8	12.5	56.7	14	68.2	14.4	67.2	17.2
70	4	35.6	12.9	51.8	13.6	77	15.5	91.7	17.2
70	4	36.2	12.9	49.7	13.4	59.2	14.6	76.8	17.2
70	4	37	12.7	62.4	14.5	76.1	15.2	77.7	17.2
70	4	35	12.1	48.3	12.8	56.9	14.4	82.4	17.2
70	4	35.9	12.5	53.9	13.6	54.6	14.1	84.9	17.2
70	4	37	12.8	47.8	13.3	67.1	14.7	68.1	17.2
70	4	35.4	12.5	50.4	13.5	73.2	14.5	77.8	17.2
70	4	35.93	12.6						17.2
74	4	30.8	12.2	53.4	13.8	76	14.9	105.2	17.2
74	4	31	12	41.9	12.8	54.6	14.2	72.2	17.2
74	4	30.4	11.8	57.1	13.5	55.1	14.2	95.4	17.2
74	4	32.8	12	45.9	13.3	73.7	15.3	96.1	17.2
74	4	30.2	11.8	50.3	12.6	72.3	14.6	85.8	17.2
74	4	32.1	12.5	44.1	13	70.2	15	112.3	17.2
74	4	30.4	12.1	44.6	13	55.1	15	100.7	17.2
74	4	30	11.5	54.1	12.8	54.8	12.5	99.9	17.2
74	4	31.6	12.1	44.2	12.7	65.3	14.4	71.7	17.2
74	4	32.6	12	53.2	13.5	60.4	14.6	78.1	17.2
74	4	34.7	11.5	45.4	13.1	54.8	14.1	105.1	17.2
74	4	34.2	11.5	52.8	13.7	66.2	14.5	78.4	17.2
74	4	30	12.1	45.4	13.4	56.2	14	83.5	17.2
74	4	33.9	12.2	45	13.3	58.2	14.2	84	17.2
74	4	34.7	12.4	46.6	13.1	57.7	14.8	89.2	17.2
74	4	34.2	12	58.4	14.2	71.8	14.9	72.6	17.2
74	4	30	11.8	46.4	12.8	72.4	14.4	88	17.2
74	4	33.9	12.5	57.6	14.2	65.5	14.5	88	17.2
74	4	32.8	12.2	50.7	13.4	70.4	15	92.3	17.2
74	4	32.5	11.8	48.7	13.4	73.5	15.1	90.2	17.2
74	4	34.2	12	49.6	13.4	74.7	15.5	97.8	17.2
74	4	30.8	12	45.2	13.5	75	15.2	75.5	17.2
74	4	31.6	11.6	50.2	13.6	59.4	14.3	89.2	17.2
74	4	32.5	12	47.8	12.8	68.7	15.2	79.9	17.2
74	4	34.9	12	49	13.5	74.6	14.9	83.8	17.2
74	4	33.6	12.5	54.8	14	71.4	15.1	95.7	17.2
74	4	32.4	11.6	57.3	13.8	56.5	14.3	70.2	17.2
74	4	34.5	12.4	55	13.6	68.9	14.8	98.9	17.2
74	4	32.3	12	50.6	13.3	59.3	14.4	85.2	17.2
74	4	31.8	12	45.8	13	75.9	15.3	70.7	17.2
74	4	31.2	12	55.6	13.5	64.6	14.5	71	17.2
74	4	33.8	12.3	52.1	13.6	70.7	15.2	84.4	17.2
74	4	35.9	12.8	48.5	12.5	65	14.7	75	17.2
74	4	36.7	12.9	53.6	14.2	69.1	15.1	78.6	17.2
74	4	33.1	12.2	45.1	13.3	62.2	14.8	72.2	17.2
74	4	32.5	11.9	52.8	13.9	63.5	14.7	89.5	17.2
74	4	34.2	12.1	42.4	13.2	57.1	14.2	103.1	17.2
74	4	30.8	12.1	52.6	13.5	82.2	15.7	88.5	17.2
74	4	33.1	12	53.8	13.8	63.7	14.7	100.4	17.2
74	4	31.4	12	55.4	13.8	70.4	15.2	102.4	17.2
74	4	35.9	12.5	46.2	12.4	63.5	14.4	78.8	17.2
74	4	35.8	12.3	46.7	13.5	76.2	14.1	74.7	17.2
74	4	35.7	12.5	51.3	14	56.2	13.9	85.1	17.2
74	4	36	12.5	52.7	13.7	61.3	14.5	92.2	17.2
74	4	36	12.5	45.5	13.3	59.8	14.4	78.5	17.2
74	4	36	12.7	52.2	13.9	61.9	14.6	79.3	17.2
74	4	36.2	12.5	49.7	13.6	74.6	14.9	78.9	17.2
74	4	35.6	12.5	48.4	13.2	79.2	15.8	91.7	17.2
74	4	36	12.1	52.7	13.8	58.7	14.3	100.5	17.2
74	4	36.3	12.8	49.8	13.6				17.2
79	4	30.8	12	53	13.7	59.7	14.3	71.5	17.2
79	4	32.7	12.5	56.8	13.8	81.2	15.7	99.2	17.2
79	4	34	12.2	49.7	13.4	62	14.7	83.9	17.2
79	4	31.4	12	52.1	12.8	74.7	15.3	91.3	17.2
79	4	30	12.1	50.9	13.3	62.6	13.5	78.6	17.2
79	4	30.7	11.9	46.2	13.3	62.6	14.3	52.2	17.2
79	4	31.9	12	38.8	12.4	73.2	15.2	82.1	17.2
79	4	31.2	12.5	45.5	13.2	72.1	15	64.8	17.2
79	4	31	12.1	56.7	12.7	72.8	14.9	83.3	17.2
79	4	32.5	12.5	49.4	12.4	76.9	15.4	73.5	17.2
79	4	30.9	12	51.5	12.8	70.4	14.6	80.1	17.2
79	4	30	11.7	59.6	13.8	65.9	15	98	17.2
79	4	35	12.4	53.5	14.1	77.8	15.2	82.7	17.2
79	4	31.7	12	50.3	13.6	62.6	15	86.8	17.2
79	4	30	12	51.7	13.8	73.9	15.2	105.9	17.2
79	4	34.5	12.8	52	13.9	71.2	15.2	62.6	17.2
79	4	31.2	12	54.6	13.7	52.6	14.1	97.5	17.2
79	4	34.9	12.5	56.1	13.7	64.3	14.6	74.2	17.2
79	4	30	12	47.4	13.6	69.1	14.8	66	17.2
79	4	33.4	12	51.3	13.8	67.7	14.9	99.6	17.2
79	4	33.3	12	53	13.3	61.7	14.5	92.8	17.2
79	4	32.1	12	53.3	14	66	14.8	83.6	17.2
79	4	33.4	12	48.8	13.5	71.6	15.2	84	17.2
79	4	33.6	12.1	46.4	13.2	71.1	15.5	61.1	17.2
79	4	30	11.6	46.6	13.3	74.2	14.6	88.7	17.2
79	4	31.5	12	48.5	13.1	49.3	13.6	68.9	17.2
79	4	31.9	12.1	57.5	13.6	57.6	14.5	95.9	17.2
79	4	35	12	44.4	13	61.3	14.5	67.6	17.2
79	4	33.7	12.2	52.4	14.2	64.8	15.2	73.4	17.2
79	4	31.7	12	62.1	14.3	56.5	14.4	74.9	17.2
79	4	36.4	12.5	51.7	13.6	57.9	14.9	64	17.2
79	4	30.9	11.6	58.4	13.2	55.4	13.8	85.5	17.2
79	4	31.9	12	50.5	14	57.5	14.5	82.7	17.2
79	4	32	12	55.8	13.7	68.5	15	92.7	17.2
79	4	36.7	12.5	43.6	13	59.1	14.7	100.4	17.2
79	4	36.3	12.5	47.8	13.6	57.5	14	68.1	17.2
79	4	34.1	12.3	45.6	13.2	75.8	15	98.6	17.2
79	4	35.3	12.8	53.7	13.8	59	12.5	82	17.2
79	4	32.7	12	54.6	14	61.2	14.8	89.4	17.2
79	4	33.1	12	53.3	13.9	58.3	14.3	68.6	17.2
79	4	35.4	11.3	46.8	13.2	59.9	15.2	72.8	17.2
79	4	35.5	11.4	47.4	13.4	75.3	12.9	77.3	17.2
79	4	37	11.5	54.6	14	65.7	14.5	76.1	17.2
79	4	34.1	11.2	41.5	13	61	14.8	95	17.2
79	4	32.3	10.9	48.8	13.5	54.5	14.2	72.3	17.2
79	4	36.2	11.5	45.6	13.3	52.2	14.1	80.6	17.2
79	4	35.1	10.8	45.5	12.4	51.9	13.8	87.2	17.2
79	4	34.9	10.9	48.3	12.9	56.5	14.4	63	17.2
79	4	33.5	10.3	47.7	13.3	51.4	13.3	94.1	17.2
79	4	33.4	10.5	49.5	13.7	54.2	13.8	75.1	17.2
Media		33.1882	12.0907	50.5275	13.451	64.6554	14.6372	83.8649	17.2
Std dev		2.0616	0.441223	4.52448	0.457611	7.83879	0.552457	11.6511	1.06938e-14
