# Supplementary material for: Effect of dietary oil from Camelina sativa on the growth performance, fillet fatty acid profile and gut microbiome of gilthead Sea bream (Sparus aurata)
Source: PeerJ. 2020 Dec 9;8:e10430. doi: 10.7717/peerj.10430 (PMC7733328; doi:10.7717/peerj.10430)
Supplement: Supplemental Information 2 [file peerj-08-10430-s002.xlsx]

## Sheet: Sheet1
PAPER TITLE:	Effect of dietary oil from Camelina sativa on the growth performance, fillet fatty acid profile and gut microbiome of gilthead Sea bream (Sparus aurata)
AUTHORS:	David Huyben, Simona Rimoldi, Chiara Ceccotti, Daniel Montero, Monica Betancor, Federica Iannini, Genciana Terova
CRITERIA:	Raw data for lipid analysis
	C14:0	C14:1n7	C14:1n5	C15:0	C15:1n5	C16:0 ISO	C16:0	C16:1n7	C16:1n5	C16:2n6	C16:2n4	C17:0	C16:3n4	C16:3n3	C16:3n1	C16:4n3	C16:4n1	C18:0	C18:1n9	C18:1n7	C18:1n5	C18:2n9	C18:2n6	C18:2n4	C18:3n6	C18:3n4	C18:3n3	C18:3n1	C18:4n3	C18:4n1	C20:0	C20:1n9	C20:1n7	C20:1n5	C20:2n9	C20:2n6	C20:3n9	C20:3n6	C20:4n6	C20:3n3	C20:4n3	C20:5n3	C22:1n11	C22:1n9	C22:4n6	C22:5n6	C22:5n3	C22:6n3
0%CO	2.44505	0.290157	0.37177	0.300993	0	0.235445	13.4941	4.78274	0.332845	0	0.518735	0.44422	0.322031	0.279609	0.349347	0.430706	0	3.8665	23.3649	3.14223	0.276886	0.472066	9.24185	0.344246	0	0.323682	1.7455	0	1.08674	0.292084	0.408029	0.353282	1.69011	0.430521	0.776568	0.767105	0.473105	0.571486	1.1913	0.428883	0.890078	7.21777	1.84152	0.960428	0.808846	0.936182	3.235	8.26529
0%CO	2.70307	0.164881	0.18923	0.276351	0.190663	0.145132	14.2784	5.20892	0.186445	0	0.449772	0.543318	0.188583	0.164928	0.246883	0.543607	0.158179	4.17362	23.5354	3.02589	0.195516	0.529115	9.85334	0.288727	0	0.33888	1.79	0.158583	1.28876	0.341411	0.3013	0.341573	1.34046	0.206564	0.743087	0.322459	0.153718	0.345953	0.946346	0.226117	0.805547	8.04289	1.01449	0.432576	0.290437	0.317143	2.81189	10.1999
0%CO	4.38362	0.31265	0.258804	0.299269	0.220323	0.259473	18.0041	7.65423	0.187714	0	0.727647	0.755856	0.212898	0.169981	0.234183	0.744687	0	3.16472	23.8937	3.15655	0.229447	0.545063	10.0674	0.307341	0	0.210434	1.83816	0	1.38834	0.212682	0.264149	0.241752	1.03988	0.194937	0.624355	0.264926	0.159482	0.315448	0.614382	0.21682	0.607566	6.51183	0.754218	0.396498	0.309613	0.265811	1.88074	5.89832
0%CO	2.45758	0.0446995	0.0737309	0.241857	0.0159747	0.0459825	13.9101	5.62308	0.108167	0	0.449788	0.489004	0.18695	0.0621729	0.0840855	0.446405	0.0438026	3.67826	24.6275	3.25464	0.126174	0.589836	11.1162	0.237588	0	0.128342	1.96407	0	1.28723	0.167558	0.292017	0.29825	1.46115	0.17244	0.546204	0.245978	0.101309	0.141808	0.880752	0.134371	0.708846	8.50098	1.15091	0.428897	0.166752	0.27602	2.49431	10.5382
0%CO	0.627887	0	0.586359	1.03671	0	0.56835	6.06205	2.13495	0.562944	0	0.640341	0.669068	0.572695	0	0.632294	0.603588	0	3.20362	17.7511	2.52668	0.880169	0.853956	7.76661	0.758067	0	1.16665	1.92587	0	1.06695	0.878276	0.81409	0.800184	2.37207	0.975816	0.842091	0.800847	0.600811	0.971588	1.25626	1.30718	1.35468	8.3355	2.96383	1.23068	0.998894	1.46375	4.56425	14.8723
0%CO	1.83119	0.0489844	0.0943951	0.193612	0.014496	0.0590712	12.7879	4.27991	0.130776	0	0.331133	0.368329	0.180747	0.0908215	0.176972	0.389177	0.0557391	4.50561	22.5513	3.23885	0.117035	0.48921	10.1237	0.262237	0	0.204585	1.62736	0.0733659	1.01989	0.219796	0.341149	0.345327	1.56617	0.234422	0.604292	0.375607	0.0944555	0.293534	1.1034	0.194679	0.785391	8.93816	1.13749	0.436632	0.366024	0.407227	3.6839	13.626
0%CO	2.35002	0	0.401485	0.452601	0.388099	0.607245	15.6645	4.65588	0.438292	0	0.401602	0.424768	0.568189	0.561294	0.455338	0.579899	0	5.34466	23.9688	3.5551	0.544556	0.661183	8.92288	0.462625	0	0.487446	1.98989	0	0.763702	0.450894	0.569918	0.501087	2.01052	0.805823	0.806343	0.503145	0.525219	0.697566	0.789838	0.503856	0.624004	4.13866	1.63545	0.962535	1.40155	1.26667	1.96524	5.1917
0%CO	3.44242	0.351449	0.521476	0.297017	0.242867	0.301472	19.3292	4.61243	0.295996	0	0.41942	0.504019	0.263415	0.314393	0.27072	0.477308	0	5.5373	20.9312	3.05868	0.335063	0.438039	7.42981	0.329345	0	0.306745	1.31684	0	0.73349	0.278589	0.557341	0.346226	1.70705	0.444474	0.572777	0.259617	0.352813	0.737177	1.01757	0	2.84959	5.63817	0.989611	0.563048	1.91399	1.04189	1.51868	7.15126
0%CO	3.65329	0.275373	0.302077	0.356317	0.228456	0.237866	18.4631	5.88609	0.268808	0	0.488592	0.403078	0.308237	0.276609	0.30995	0.407482	0	5.27411	25.3762	3.74358	0.26132	0.601464	9.98915	0.394062	0	0.212585	1.37894	0	0.754637	0.215379	0.474725	0.363868	1.55864	0.452238	0.649233	0.323391	0.21246	0.465543	0.758293	0.256698	0.506374	4.43307	1.39211	0.572828	0.619329	0.62202	1.40545	4.86701
20%CO	4.1874	0.101324	0.154266	0.381843	0.101996	0.111013	21.733	5.9381	0.177717	0	0.380675	0.322377	0.322377	0.235984	0.145838	0.172733	0.342427	5.8322	24.6374	3.29397	0.140296	0.344081	9.03096	0.226099	0	0.161276	3.69541	0	0.703858	0.122449	0.377335	0.278048	1.52203	0.328581	0.540225	0.285545	0.170417	0.269559	0.414074	0.171699	0.458661	4.05995	1.14395	0.53127	0.18783	0.212615	1.4202	4.63101
20%CO	1.56934	0.538092	0.760156	0.557443	0.435188	0.524263	9.16882	3.29373	0.801438	0	0.648538	0.468916	0.424282	0.443505	0.468873	0.656414	0	4.37393	21.2636	3.12049	0.685651	0.595867	10.0626	0.458838	0	0.430826	5.00638	0	0.991536	0.734057	0.541713	0.757255	2.24429	0.860824	0.996865	0.717574	0.669695	0	0.990751	0.788264	0.884871	6.52045	1.70883	1.0011	1.6518	0.856408	2.74477	7.58179
20%CO	5.62454	0.272138	0.287276	0.430657	0.307138	0.333729	20.1378	7.64888	0.303978	0	0.685662	0.629351	0.319778	0.372561	0.341729	0.670272	0	3.81927	21.4789	2.87257	0.301532	0.438761	10.2405	0.342621	0	0.280347	4.88975	0	0.892282	0.278521	0.369758	0.300913	1.00968	0.318896	0.671868	0.32594	0	0.384613	0.501759	0.416558	0.578048	3.91764	1.06605	0.369632	0.53213	1.03041	1.09869	2.90685
20%CO	2.31434	0.481546	0.544942	0.501221	0.495607	0.431793	12.8804	4.31195	0.748515	0	0.719823	1.02929	0.91	0.653539	0.703131	0.64756	0	4.0597	19.5937	2.7601	0.442334	0.714026	9.25397	0.444287	0	0.573376	4.41984	0	0.64756	0.515305	0.693266	0.44739	1.25179	0.51567	0.813242	0.707704	0.758251	1.1247	0.715357	0.488394	1.06984	4.1853	1.40492	0.69756	3.86565	3.2194	2.52395	4.71978
20%CO	4.63492	0.282289	0.297198	0.51463	0.262981	0.287923	20.2725	7.54382	0.363615	0	0.653369	0.581469	0.315801	0.309343	0.320958	0.740729	0	3.97415	21.7421	2.96368	0.292051	0.645969	10.6803	0.311088	0	0.343906	5.03034	0	1.17069	0.329366	0.348847	0.292614	0.92686	0.309322	0.541001	0.430021	0	0.294164	0.528422	0.363907	0.65871	3.67538	0.70881	0.455396	0.374785	0.543634	1.55145	3.13145
20%CO	1.61141	0	1.35895	1.5716	1.43196	1.25164	1.15987	1.49649	1.47158	0	1.18553	1.14034	1.10207	1.16454	1.47226	1.41479	0	1.52352	2.03439	1.21089	1.1506	0	1.52367	1.11672	0	1.70117	1.50527	0	1.99451	1.20734	4.43272	0	0	0	3.76062	3.66894	0	3.97329	0	3.45263	6.50241	5.32913	4.18872	5.73124	5.34838	5.04155	7.11819	7.65106
20%CO	1.77484	0.0389683	0.0560458	0.180656	0.0213816	0.0416526	11.9009	4.16197	0.0849712	0.0202709	0.348944	0.363014	0.166171	0.0665284	0.113561	0.370499	0.0239155	4.10258	22.8898	3.03365	0.108516	0.454776	11.6153	0.208598	0	0.175033	5.01755	0.0261485	1.08604	0.18002	0.321847	0.330363	1.735	0.197653	0.69407	0.407397	0.0504459	0.293118	0.949088	0.271644	0.839449	7.78366	1.36912	0.654443	0.258304	0.374699	3.73199	12.8802
20%CO	2.13998	0.295908	0.312118	0.308872	0.557725	0.292457	14.4245	4.73227	0.273508	0	0.420464	0.44129	0.253157	0.263046	0.282751	0.393793	0	4.5735	20.8895	3.00603	0.381358	0.519104	9.85797	0.362344	0	0.285986	4.62552	0	1.04039	0.200483	0.325653	0.29332	1.49119	0.488065	0.540059	0.506755	0.331111	0.510713	0.766296	0.347957	0.889278	7.19698	1.09359	0.59653	0.445227	0.465589	3.2482	9.32954
20%CO	1.94348	0.168103	0.184596	0.243701	0.29146	0.167673	13.0696	4.41334	0.17924	0.00988103	0.381964	0.399317	0.208565	0.164978	0.197833	0.379032	0.0116576	4.30438	21.6838	2.99349	0.245062	0.483257	10.6293	0.284266	0	0.229428	4.7766	0.0127461	1.05364	0.188774	0.320981	0.308839	1.59713	0.342282	0.61046	0.453939	0.191436	0.400229	0.848768	0.307748	0.857296	7.42069	1.21843	0.619598	0.35026	0.417257	3.45592	10.9796
40%CO	0.693798	0	0.403631	0.442646	0.994883	0.412782	7.60655	2.06834	0.384436	0	0.401717	0.47619	0.398433	0.418795	0.366689	0.471864	0	4.20861	18.3735	2.57928	1.15663	0.91357	10.6736	0.750276	0	0.735531	7.97148	0	1.08691	0.492487	0.725576	0.731907	1.96794	1.02019	1.10668	0.909651	0	0.990466	1.0348	0.628103	1.0092	5.91392	2.06299	1.46778	1.14796	0.76843	3.51938	10.5124
40%CO	1.38227	0	1.04316	1.23072	1.41554	1.2489	3.61525	1.29034	1.25438	0	1.22702	1.26054	1.08119	1.53183	1.78708	1.70475	0	1.19985	4.91229	1.5863	1.45756	1.1428	3.26055	1.09046	0	1.05239	2.07347	0	1.45676	1.34251	0	1.77342	1.33819	1.88875	0	0	0	6.55572	3.7686	3.62	3.98615	2.87478	2.71938	6.61283	5.81577	7.52447	5.91165	3.95787
40%CO	2.11849	0.0343305	0.0630725	0.207883	0.0194095	0.0401189	13.6147	4.52906	0.100647	0.0106436	0.354315	0.353937	0.183962	0.0571952	0.0787379	0.310496	0	4.26163	23.9918	2.83268	0.114657	0.39259	13.8721	0.199961	0	0.139877	10.1415	0.0230203	1.01937	0.146155	0.290842	0.247635	1.41087	0.154454	0.488737	0.317074	0.0321084	0.167719	0.584285	0.314085	0.621048	5.38966	0.917435	0.428742	0.167419	0.195073	2.14721	6.9132
40%CO	3.05698	0.05217	0.15903	0.27156	0.0261	0.07027	15.6303	5.2037	0.14114	0	0.39494	0.43555	0.17876	0.04668	0.1623	0.4148	0	4.00177	21.5527	2.56908	0.10701	0.29824	13.7172	0.17481	0.41927	0.12735	10.8984	0.03828	1.02501	0.1375	0.2271	0.233	1.13271	0.13199	0.41789	0.25786	0.0279	0.22941	0.62405	0.26808	0.57248	5.41968	0.63858	0.32404	0.16674	0.22943	1.76457	6.02363
40%CO	1.0291	0	0.36778	0.38229	0.40193	1.34836	8.88179	3.00292	0.53214	0	0.4441	0.71627	0.5043	0.94149	0.84813	0.71629	0	3.88939	19.4498	2.55294	0.42485	0.59011	11.4689	0.38031	0.6108	0.70298	8.59511	0	1.17168	0.65735	0.61228	0.44855	1.69094	0.80627	0.57702	0.75833	0	0.5553	0.80702	0.53766	1.05448	6.12424	1.49762	0.65662	1.20714	0.82554	2.882	8.34786
40%CO	1.59636	0.23416	0.34345	0.25954	0.22939	0.20715	11.7991	3.26789	0.20377	0	0.48164	0.41268	0.3358	0.17109	0.29499	0.52505	0	4.2319	19.2662	2.50588	0.21627	0.27411	12.2894	0.35433	0.43272	0.28116	9.50166	0	0.94417	0.33281	0.61539	0.38143	1.48413	0.28179	0.73706	0.57873	0	0.35431	1.00652	0.69012	0.81619	6.57604	0.99287	0.67292	0.43795	0.29279	3.10267	9.98644
40%CO	2.43633	0.03446	0.07691	0.24765	0.01544	0.04401	14.2667	4.70909	0.11363	0	0.39186	0.40901	0.17465	0.0704	0.13291	0.38001	0.02369	4.53648	21.7766	2.69798	0.10419	0.38549	14.9756	0.19238	0.51544	0.1392	10.9901	0.02955	10.3092	0.14527	0.24146	0.19862	1.11761	0.1259	0.40489	0.29095	0	0.15394	0.67303	0.31995	0.55856	5.02707	0.59693	0.29997	0.13753	0.19052	1.88711	6.73005
40%CO	2.18629	0.03624	0.06537	0.20562	0.02607	0.75575	19.4707	3.95545	0.12486	0	0.38176	0.32966	0.16284	0.70951	0.06502	0.21572	0	1.05174	17.9396	2.34073	0.39614	0.34492	10.935	0.15287	0.32293	0.05151	8.37784	0.06334	0.74588	0.08925	0.19394	0.18765	0.91641	0.10335	0.34902	0.34998	0.05247	0.19756	0.74006	0.57774	0.47206	5.36465	0.4697	0.26168	0.10727	0.19361	1.77194	6.65601
60%CO	2.22388	0.37089	0.25169	0.28853	0.25005	0.26241	12.8951	3.68729	0.29907	0	0.4605	0.33076	0.21938	0.27873	0.34165	0.43697	0	4.05969	20.5664	2.18293	0.33914	0.38696	15.2692	0.32893	0.51238	0.35818	14.5766	0	0.92312	0.22283	0.42679	0.31616	1.27951	0.27935	0.47083	0.4992	0	0.24187	0.69414	0.51088	0.7728	3.87495	0.59135	0.5231	0.56914	0.29824	1.76211	4.56631
60%CO	1.65496	0	0.7526	0.56023	0.65277	0.56311	9.74431	2.09683	0.64433	0	0.55616	0.68365	0.59425	0.69214	0.80369	1.11668	0	4.78789	16.8672	2.00824	0.70733	0.68665	11.9258	1.25081	1.68209	0.56415	9.12786	0	1.26234	1.19441	3.78343	0.8908	2.03306	0.59313	0.76186	0.76312	0	0.91552	0.91674	1.28465	1.12472	2.85602	1.19752	1.06485	0.81928	1.62351	1.49044	4.70079
60%CO	2.22252	0.04014	0.0685	0.22645	0.01846	0.04208	14.9103	4.36246	0.10229	0	0.32899	0.34847	0.17977	0.05651	0.17536	0.36279	0.01315	4.78872	21.4939	2.61342	0.10372	2.61342	13.4749	0.17821	0.41266	0.12283	9.69418	0	0.87837	0.12859	0.24128	0.18946	1.14896	0.11958	0.45649	0.29452	0.04001	0.23943	0.83976	0.29783	0.6025	5.92015	0.59835	0.32255	0.14325	0.24682	2.13938	8.44541
60%CO	1.49496	0.47132	0.47457	0.38715	0.39807	0.39316	10.9637	2.93517	0.59877	0	0.43892	0.49937	0.37749	0.3695	0.4119	0.48933	0	4.30872	20.664	2.29942	0.38665	0.55236	13.1331	0.42967	0.55681	0.50602	12.2364	0	0.97932	0.36263	0.40279	0.35296	12.3924	0.36716	0.61967	0.66799	0	0.39836	0.57153	0.52236	0.72015	4.41315	1.01245	0.92662	0.77765	0.78683	2.19902	6.90355
60%CO	2.52708	0.03786	0.07265	0.24768	0.01942	0.04464	16.427	4.23761	0.1146	0	0.28109	0.26651	0.18566	0.05606	0.14038	0.23871	0.01587	5.13656	24.4674	2.57249	0.09715	0.36761	15.4067	0.14684	0.43935	0.11972	12.0558	0.01137	0.68485	0.08605	0.26266	0.20029	13.2284	0.1224	0.40179	0.36301	0.0232	0.19763	0.49759	0.37371	0.4612	2.94055	0.65094	0.35116	0.14593	0.13654	1.14997	3.89375
60%CO	2.23215	0.0936	0.08352	0.24596	0.10401	0.09203	12.5666	3.81667	0.20618	0	0.32837	0.39748	0.31579	0.12319	0.19747	0.31758	0	3.86219	21.8398	2.14768	0.14292	0.43481	14.092	0.22606	0.56687	0.43495	13.6056	0	1.0508	0.43953	0.29876	0.2109	12.1422	0.2873	0.62523	0.40331	0	0.40812	0.5769	0.55258	0.75179	3.90397	1.02803	0.77782	0.82137	0.56919	1.90585	5.70082
60%CO	1.42013	0	0.62062	0.74999	0	0.47589	6.85455	1.9915	0.51093	0	0.71303	0.62509	0.58521	0.49763	0.7143	0.94598	0	3.81938	17.5075	2.38865	0.75843	0.5746	12.4527	0.43698	0.80189	0.64716	12.2229	0	1.723	0.68219	0.89146	0.56514	1.90381	0.65674	1.09877	0.88122	0	0.94644	0.7999	1.00368	0.99289	4.85028	1.47252	0.99759	1.6683	0.51418	2.5251	7.51184
60%CO	1.34721	0.13969	0.18307	0.25199	0.11302	0.17957	10.4337	3.13248	0.11491	0	0.35049	0.26043	0.1974	0.16915	0.13777	0.29874	0	3.96356	22.5373	2.3708	0.18598	0.51991	14.5886	0.21063	0.76212	0.19837	12.1958	0	1.13728	0.2451	0.42226	0.29646	1.59808	0.26749	0.50684	0.38085	0	0.23725	0.62518	0.5147	0.6008	4.81525	1.28932	0.62547	0.44341	0.25519	2.22573	8.67064
60%CO	1.78089	0.10846	0.15588	0.19333	0.10517	0.1087	12.5231	3.50422	0.12964	0	0.32706	0.31256	0.19116	0.13186	0.15898	0.32309	0	4.25771	22.0287	2.30263	0.11435	0.37498	15.1016	0.18765	0.55218	0.16626	13.7179	0	0.96075	0.15576	0.32599	0.24614	1.35605	0.21449	0.39857	0.37498	0	0.16993	0.64381	0.37851	0.54484	4.64828	0.84845	0.44002	0.21072	0.18675	1.8512	7.18656
